1  
2  
3  
4  
5  
6  
7  
8  
9  
10  
11  
12  
13  
14  
15  
16  
17  
18  
19  
20  
21  
22

**Oligopaint DNA FISH as a tool for investigating meiotic chromosome dynamics in the silkworm, *Bombyx mori***

Leah F. Rosin<sup>1,2,\*</sup>, Jose Gil Jr.<sup>3,4</sup>, Ines A. Drinnenberg<sup>3,4</sup>, Elissa P. Lei<sup>1,2,\*</sup>

<sup>1</sup>Nuclear Organization and Gene Expression Section; <sup>2</sup>Laboratory of Biochemistry and Genetics, National Institute of Diabetes and Digestive and Kidney Diseases, National Institutes of Health, Bethesda, Maryland, USA; <sup>3</sup>Institut Curie, PSL Research University, CNRS, UMR3664, 75005 Paris, France; <sup>4</sup>Sorbonne Université, Institut Curie, CNRS, UMR3664, 75005 Paris, France

\*Corresponding authors:

E-mail: leah.rosin@nih.gov; leielissa@nidk.nih.gov

## 23 **Abstract**

24           Accurate chromosome segregation during meiosis is essential for reproductive success. Yet,  
25 many fundamental aspects of meiosis remain unclear, including the mechanisms regulating homolog  
26 pairing across species. This gap is partially due to our inability to visualize individual chromosomes  
27 during meiosis. Here, we employ Oligopaint FISH to investigate homolog pairing and compaction of  
28 meiotic chromosomes in a classical model system, the silkworm *Bombyx mori*. Our Oligopaint design  
29 combines multiplexed barcoding with secondary oligo labeling for high flexibility and low cost. These  
30 studies illustrate that Oligopaints are highly specific in whole-mount gonads and on meiotic  
31 chromosome spreads. We show that meiotic pairing is robust in both males and female meiosis.  
32 Additionally, we show that meiotic bivalent formation in *B. mori* males is highly similar to bivalent  
33 formation in *C. elegans*, with both of these pathways ultimately resulting in the pairing of  
34 chromosome ends with non-paired ends facing the spindle pole and microtubule recruitment  
35 independent of the centromere-specifying factor CENP-A.

## 36 37 **Author's Summary**

38           Meiosis is the specialized cell division occurring exclusively in ovaries and testes to produce  
39 egg and sperm cells, respectively. The accurate distribution of chromosomes (the genetic material)  
40 during this process is essential to prevent infertility/sterility and developmental disorders in offspring.  
41 As researchers are specifically unable to study the mechanisms regulating meiosis in depth in  
42 humans, identifying broadly conserved aspects of meiotic chromosome segregation is essential for  
43 making accurate inferences about human biology. Here, we use a sophisticated chromosome painting  
44 approach called Oligopaints to visualize and study chromosomes during meiosis in the silkworm,

45 *Bombyx mori*. We illustrate that Oligopaints are highly specific in *B. mori* and demonstrate how  
46 Oligopaints can be used to study the dynamics of meiotic chromosomes in diverse species.

47

## 48 **Introduction**

49 Precise homolog pairing and unpairing during meiosis is essential for genetic recombination  
50 and accurate chromosome segregation. Errors in chromosome segregation during meiosis can lead to  
51 reduced fertility, miscarriages, or chromosomal disorders in progeny, such as Down Syndrome or  
52 Turner Syndrome (1). Decades of research has gone into characterizing the synaptonemal complex  
53 (SC), a proteinaceous structure that holds homologs together during meiotic prophase and is  
54 conserved across species (2,3). Yet how homologs find each other and come together in 3D space is  
55 still poorly understood. One of the main reasons that homolog pairing has remained such an enigma  
56 is the lack of cytological tools available for assaying chromosome- and locus-specific pairing dynamics  
57 during meiosis. Several recent studies have taken advantage of advances in super resolution  
58 microscopy techniques, such as Structure Illumination Microscopy (SIM) and Stochastic Optical  
59 Reconstruction Microscopy (STORM), to visualize meiotic pairing in more detail than ever before (4–  
60 9). However, these approaches have been limited to studying pairing genome-wide by fluorescently  
61 labeling elements of the SC (5,7–12) or to visualizing small genomic loci by FISH (13–16).

62 Recent technological innovations in the design and synthesis of specialized DNA FISH probes  
63 called Oligopaints have made visualizing whole, individual chromosomes or complex sub-  
64 chromosomal loci in meiotic cells feasible. Unlike traditional BAC-based FISH probes, Oligopaints are  
65 computationally designed based on genome sequence data (17,18). This approach allows for only  
66 unique, single copy sequences to be labeled, significantly increasing the specificity and resolution of  
67 FISH. Here, we leverage the flexibility of the Oligopaint design to add barcodes to label either whole

68 chromosomes or different sub-chromosomal loci using the same set of oligos, as previously described  
69 (19). This multiplexed approach allows for many different highly specific FISH probes to be generated  
70 at low cost and high throughput. Oligopaints and related oligo-based FISH approaches have  
71 previously been used for karyotype analyses or characterization of interphase chromosome dynamics  
72 in *Drosophila*, *C. elegans*, mammals, and plants (16,19–31). Recently, similar approaches have also  
73 been applied to the study of small chromosomal loci during meiosis (32,33), but Oligopaints have  
74 never before been used to characterize compaction and pairing of multiple, whole chromosomes  
75 during meiosis. Finally, Oligopaints have never been used to visualize chromosomes in Lepidoptera  
76 (moths and butterflies).

77         Here, we combine Oligopaint DNA FISH with one of the first model systems ever used to study  
78 meiotic chromosomes, the silkworm moth *Bombyx mori*. *B. mori* are holocentric insects, with  
79 centromeres forming all along the chromosome during mitosis (34–37). The holocentric mitotic  
80 configuration is also seen in many plants and nematodes, including *C. elegans* (38–40). However, the  
81 holocentric chromosome configuration prevents accurate biorientation of bivalents formed after  
82 recombination and is therefore incompatible with canonical meiosis (40,41). Instead, chromosomes  
83 in holocentric organisms often display “telokinetic” or “telokinetic-like” chromosomes during meiosis,  
84 where kinetochore activity is restricted toward telomere domains (42–48). In *C. elegans*, which  
85 telomere faces poleward to connect to the spindle microtubules is dictated by crossover position  
86 (42,46,49–51). A similar telokinetic mechanism for segregation meiotic chromosomes was also  
87 previously hypothesized to occur in *B. mori* (52–54) but has never before been directly observed.  
88 Furthermore, meiotic segregation in *C. elegans* occurs in the absence of the centromere-specifying  
89 factor Centromere Protein A (CENP-A) (51), and instead, microtubules either run parallel to  
90 chromosomes to facilitate segregation or directly penetrate chromosome ends (47,55). Interestingly,



91 CENP-A is entirely absent from the genomes of butterflies and moths (56). Yet, how moths and  
92 butterflies segregate chromosomes during meiosis in the absence of CENP-A remains to be explored.

93 Unlike *B. mori* spermatogenesis, which has been reported to support crossovers and canonical  
94 pairing, oogenesis in *B. mori* is quite unconventional. Chiasmata are not observed in female meiosis in  
95 silkworms and furthermore, the central elements of the SC break down just after pachytene (one of  
96 the sub-stages of meiotic prophase I) and the lateral elements of the SC are thought to be completely  
97 remodeled to form masses of “elimination chromatin” between the two homologs (54,57–59). This  
98 “elimination chromatin” or “modified SC” is reported to be over one micron in width, thereby  
99 ultimately undoing end-to-end homolog pairing while still holding homologs together until anaphase I  
100 (59). Thus, pairing along the entire length of the chromosomes is not expected after pachytene.

101 Our studies here illustrate that Oligopaints are robust and specific in germline cells and that  
102 Oligopaints can be used to visualize chromosomes even in unconventional model systems with draft  
103 genomes. Our FISH-based assays clearly demonstrate that telomeric regions face poleward and likely  
104 act as localized kinetochores during *B. mori* male meiosis and that both telomeres on any given  
105 chromosome harbor the ability to act as local kinetochores. Additionally, our data suggest that in  
106 female meiosis, homologs remain tightly paired throughout meiotic prophase I despite modifications  
107 to the SC. Overall, we provide the first extensive characterization of whole and sub-chromosome  
108 dynamics in meiosis in any species, thereby pioneering the use of Oligopaints as a tool for studying  
109 meiotic pairing and progression.

110

111

112

113

## 114 **Results**

### 115 ***Bombyx mori* Oligopaint design**

116 To visualize chromosomes in the silkworm, *B. mori*, we designed and generated Oligopaint  
117 libraries targeting six of the 27 autosomes and the Z sex chromosome. These Oligopaint libraries were  
118 designed using the Oligominer pipeline (18,60) based on the updated 2019 silkworm genome  
119 assembly (61). Oligos were designed with 80 base pairs of homology and map to the genome only  
120 once (therefore only labeling unique, single copy sequences). This yielded a maximum probe density  
121 of approximately 3 oligos per kilobase (kb) of DNA. For most chromosomes, this density was then  
122 reduced to 1 or 1.5 probes per kb (see Table 1), a probe density that has been previously shown to be  
123 sufficient for whole chromosome paints (Rosin et al 2018). The resulting oligos are fairly evenly  
124 distributed along each chromosome, with gaps in regions where repetitive sequences are more  
125 abundant (Figure 1A-C). These oligo libraries were then multiplexed as previously described (19) with  
126 one or more barcode sequences to allow for the amplification of individual chromosomes, sub-  
127 chromosomal stripes, and/or active and inactive chromatin domains (Tables 1-5; Figure 1B-C, Figure  
128 S1). In total, the libraries consisted of 191,536 oligos (designated as “primary oligos”) up to 160 bp in  
129 length, which includes the 80 bp of homology, up to two unique 20 bp sub-chromosomal barcodes,  
130 and two 20 bp whole chromosome universal barcodes (Figure 1D). During the PCR amplification  
131 steps, secondary oligo binding sites are added to the primary oligos, to which fluorescently labeled  
132 secondary oligos will anneal during the FISH protocol (Figure 1E; (21,30)). This method allows for  
133 increased flexibility when combining probes for multi-channel imaging. Together, this multiplexed  
134 probe design combined with secondary oligo labeling both increases the efficiency of Oligopaint  
135 synthesis and reduces the cost of Oligopaints.

136

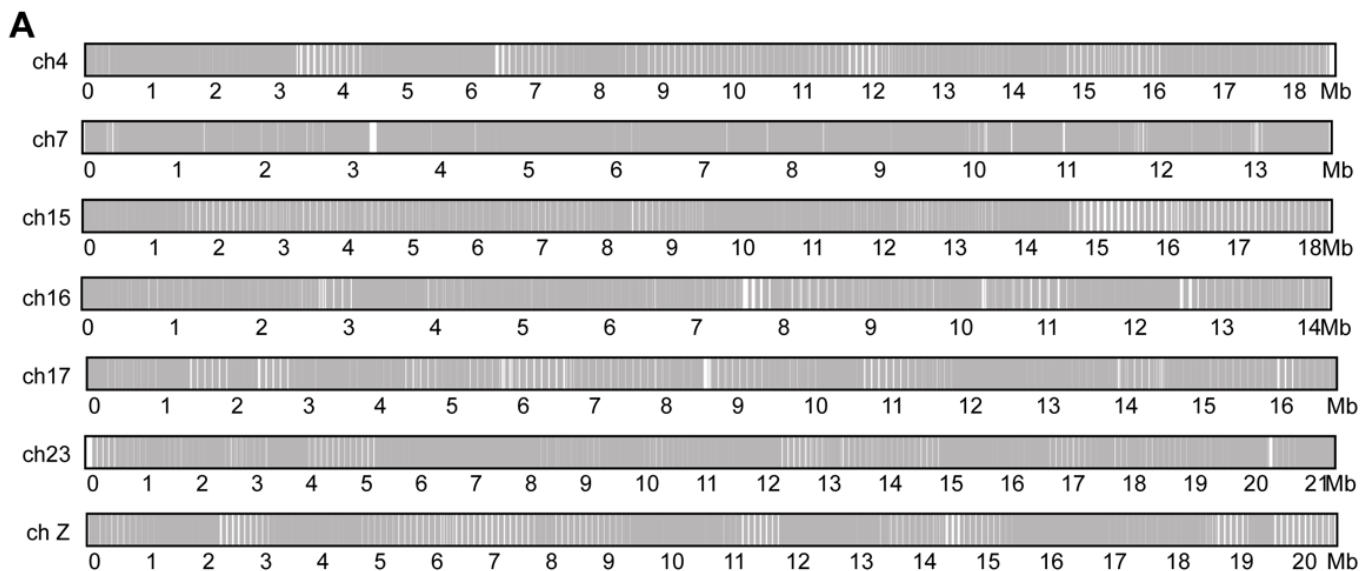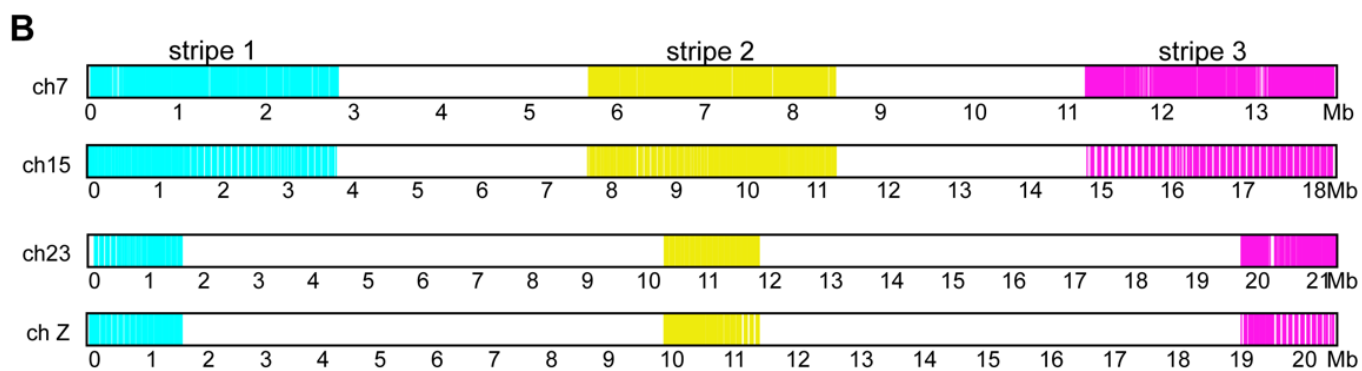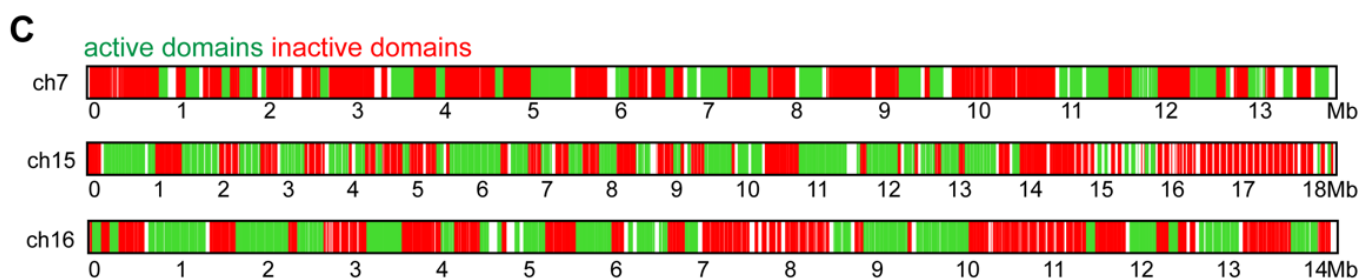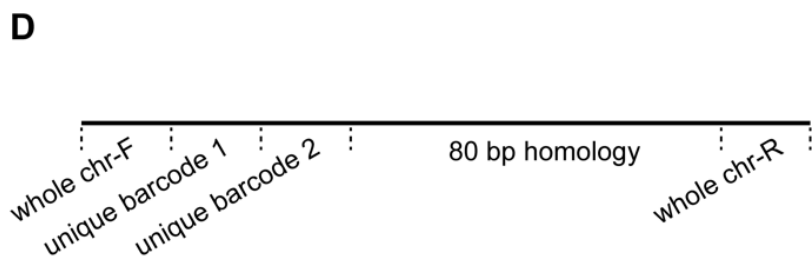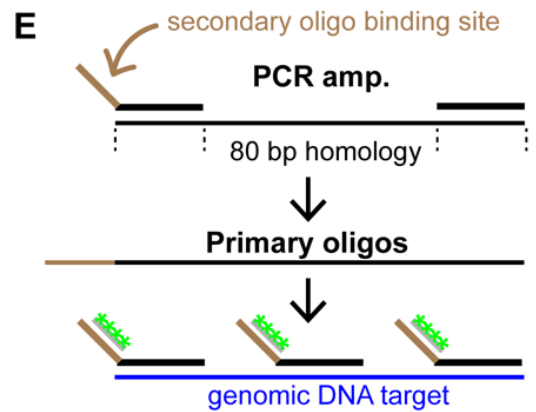

137

138

139

140 **Figure 1. *B. mori* Oligopaint design.**

141 A-C) Schematic of Oligopaints in *B. mori*. Whole chromosome Oligopaints are shown in A, stripe Oligopaints in B, and  
142 active/inactive Oligopaints in C. White regions indicate the absence of oligos (A) or regions not labeled by the respective  
143 barcode indices (B, C). D) Schematic of primary probe design, showing whole chromosome barcodes and two unique  
144 barcodes (for stripes or active/inactive domains). E) Schematic for Oligopaint DNA FISH assay with labeled secondary  
145 oligos. First, ordered oligos are amplified with primers containing barcode of interest and secondary oligo binding site,  
146 generating primary oligos. Primary oligos are then annealed to DNA and labeled with secondary oligos (shown in green).  
147

148 ***B. mori* Oligopaints are highly specific**

149 As the *B. mori* genome used to design the Oligopaints is in a semi-draft state (assembled into  
150 chromosomes but still with many unmapped contigs), we first tested the specificity of our *B. mori*  
151 chromosome paints using karyotype analysis. To this end, meiotic chromosome spreads were  
152 prepared from late 4<sup>th</sup> or early 5<sup>th</sup> larval testes and ovaries. As silkmths have a very short adult  
153 lifespan (only 5-7 days), meiosis begins early in the larval stages (62). Due to the small, holocentric  
154 nature of silkworm chromosomes, mitotic chromosomes are small and highly compact, while  
155 chromosomes in meiotic prophase I (pachytene sub-stage; Figure 2A; reviewed in (63)) are more  
156 linear due to synapsis (Figure S2)(64), making meiotic chromosomes better suited for our karyotype  
157 analyses. Since homologs are paired during most sub-stages of meiotic prophase I (Figure 2A), the  
158 expectation was a single fluorescence signal per chromosome. A detailed description of our  
159 pachytene chromosome spread protocol used for Oligopaint FISH can be found in the Materials and  
160 Methods.

161 Using our whole chromosome paints, three chromosomes at a time were labeled on  
162 pachytene chromosome spreads from testes and ovaries. This, indeed, illustrated singular and  
163 distinct fluorescence signals for each tested chromosome during pachytene (Figure 2B-2E, 2F, and 2I).  
164 In our larval testes squashes, we also were able to identify cells in early meiotic prophase I before  
165 pairing has completely occurred (leptotene/zygotene; (Figure 2F, 2H). Interestingly, a wide variety of  
166 partially paired chromosome configurations were observed at this stage, many of which contain large

167 chromosome loops (Figure S3A). Furthermore, we noticed that all chromosomes do not pair  
168 simultaneously, as many cells harbor some paired and some unpaired chromosomes (Figure S3B).

169 In addition to early prophase, cells in late prophase (post-pachytene) could also be  
170 distinguished. In our testes squashes, we identified cells with more condensed, paired chromosomes  
171 as being in diplotene/diakinesis (also known as the diffuse stage based on chromatin morphology,  
172 Figure 2F, 2J). Furthermore, we were able to identify cells in which chromosomal bivalents are  
173 compacted and aligned at the metaphase plate (metaphase I, Figure 2G, 2K). Finally, we observed  
174 somatic cells in our testes squashes harboring two distinct fluorescence signals per chromosomes,  
175 indicating that homologs are unpaired in the majority of somatic cells in *B. mori* (Figure S4).

176 In larval ovary squashes, we were able to identify linear, paired pachytene chromosomes  
177 (Figure 2E). Additionally, post-pachytene nurse cells could be identified by their unpaired, condensed  
178 chromosomes (Figure S5; (58)). Finally, mitotic cells are also present in the gonads, and thus were  
179 also used as additional validation of our probe specificity (Figure 2L, S2, and S6). Interestingly, when  
180 we tested these same whole chromosome paints on mitotic chromosome spreads from a *B. mori*  
181 ovary-derived cell line, BmN4, we found that our probes partially labeled multiple chromosomes,  
182 suggesting that the karyotype in these cells has undergone dramatic rearrangements compared to  
183 the genome-derived strain (Figure S7). Together, these data not only illustrate that our Oligopaint  
184 libraries are specific but also act as a validation for the *B. mori* genome assembly.

185

186

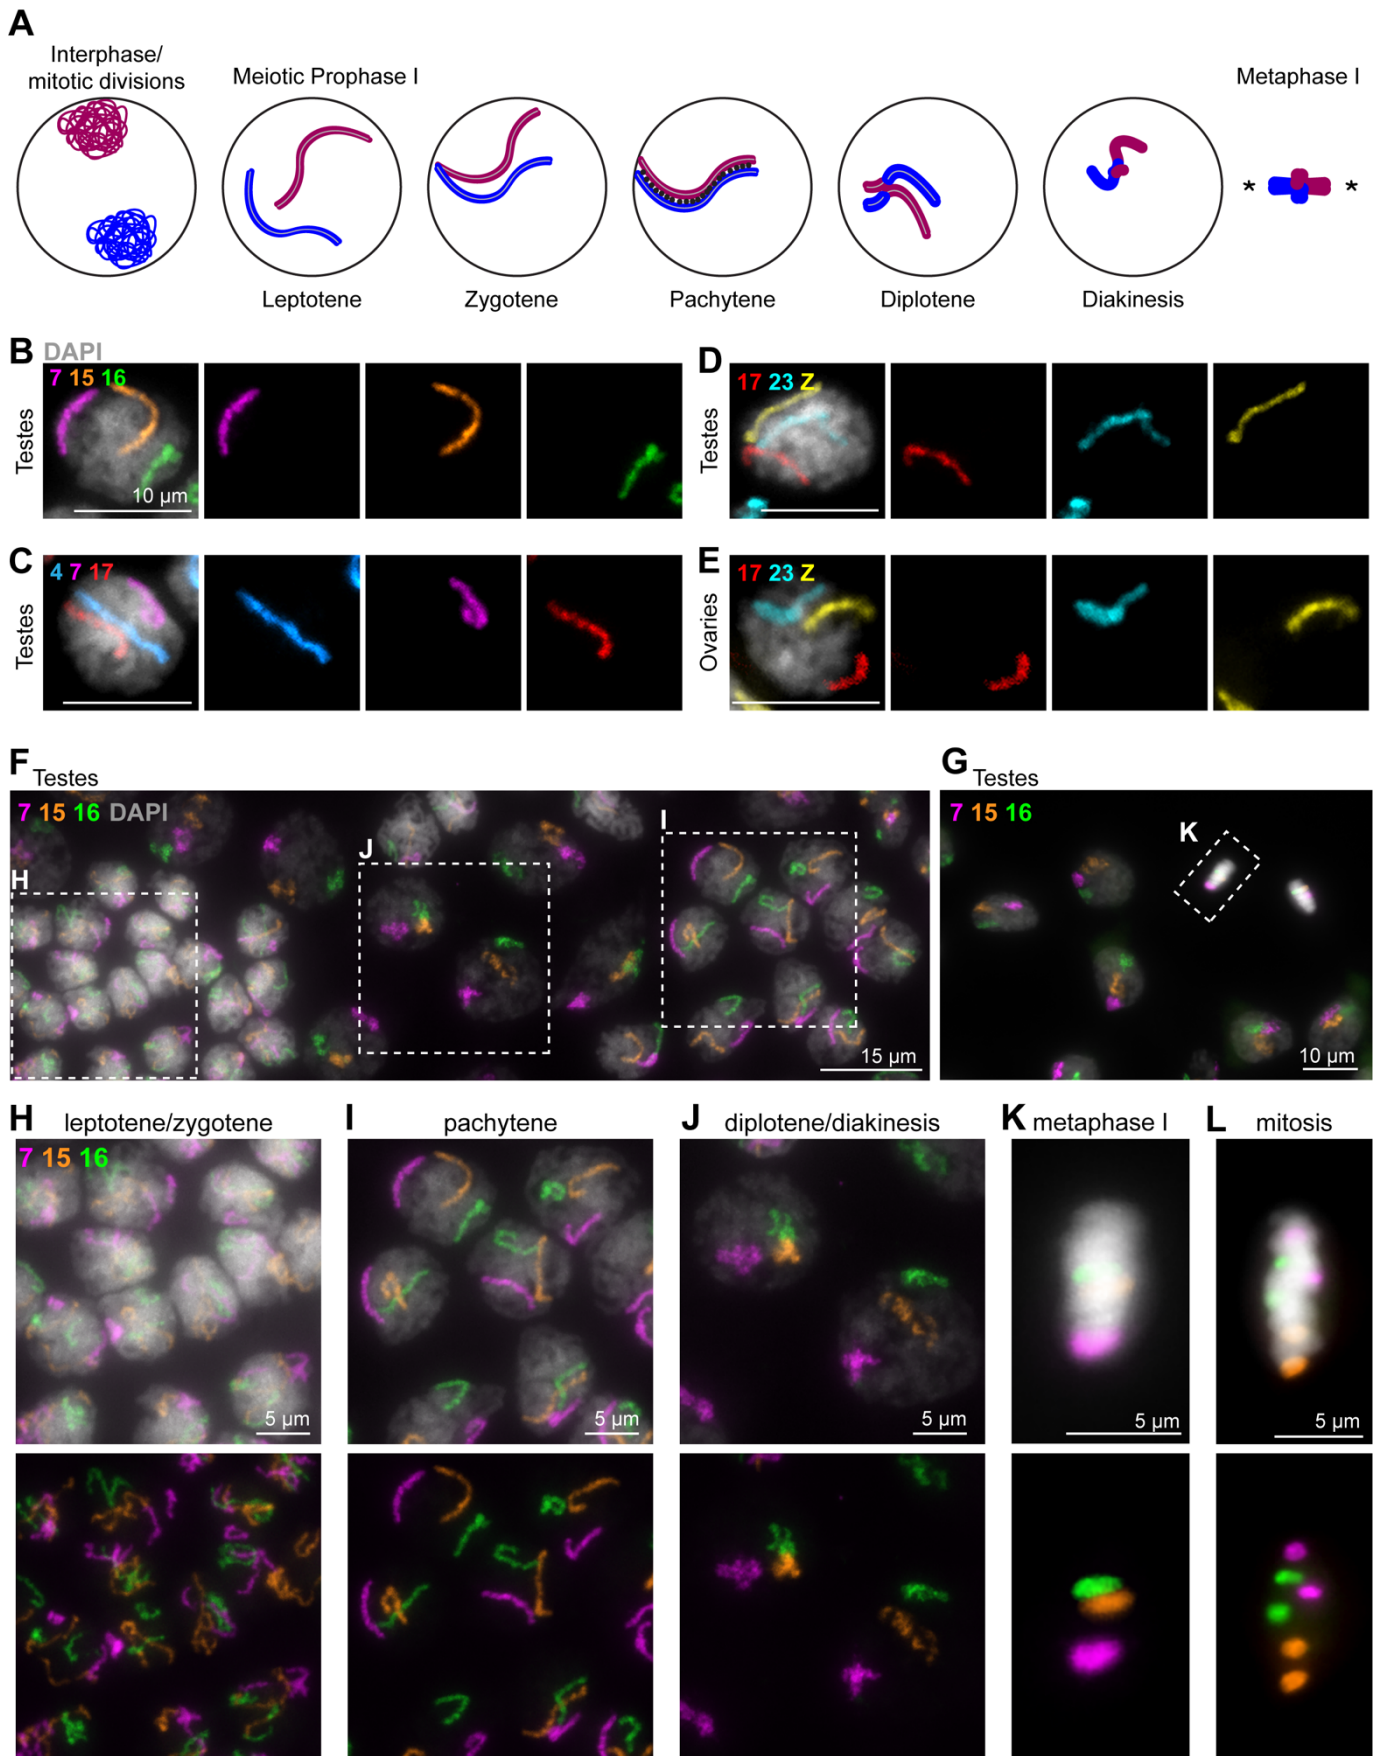

187

188



189 **Figure 2. Whole chromosome Oligopaints in *B. mori* 5<sup>th</sup> instar germline squashes.**

190 A) Schematic of early meiosis I (prophase I and metaphase I). One pair of homologous chromosomes is shown (red =  
191 paternal; blue = maternal). Prophase I is typically subdivided into five distinct stages: leptotene, zygotene, pachytene,  
192 diplotene, and diakinesis. Briefly: *in leptotene, replicated chromosomes are reorganized and compacted into a linear*  
193 *scaffold structure. In zygotene, synapsis begins between the homologous chromosomes. In pachytene, synapsis is*  
194 *complete (black dots represent the synaptonemal complex holding the homologs together). This is also when crossing over*  
195 *can occur. In diplotene, the homologs repulse, condense further, and the SC breaks down. The homologs remain attached*  
196 *via chiasma (crossovers). Finally, in diakinesis, chromosome condensation and cruciform bivalent formation is nearly*  
197 *complete as the cell prepares for metaphase I. Asters in metaphase I schematic indicate the spindle poles. B-E) Pachytene*  
198 *cells labeled with three whole chromosome Oligopaints, as labeled. A-C, larval testes. D, larval ovary. Scale bars = 10 μm.*  
199 DAPI is shown in gray. F-G) Meiotic prophase I and metaphase I (F) cells from larval testes squash with whole  
200 chromosome paints for ch7 (magenta), ch15 (orange), and ch16 (green). Boxes indicate subsequent panels as indicated.  
201 DAPI is shown in gray. H-K) Zooms from E-F, as indicated below. H) Leptotene/zygotene cells, with unpaired, decondensed  
202 chromosomes. I) Pachytene cells, with paired, linear, and relatively decondensed chromosomes. J) Diplotene/diakinesis  
203 cells, with paired, less linear and more compact chromosomes. K) Metaphase I cells, with paired homologs condensed and  
204 aligned along the metaphase plate. L) Mitotic cells from larval testes, with chromosomes condensed and aligned along the  
205 metaphase plate but with unpaired homologs.  
206

207 **Detection of stripe and chromatin state sub-libraries**

208 While the specificity of our whole chromosome paints indicated that the *B. mori* genome is  
209 accurately assembled at the chromosome level, we needed to validate the intra-chromosomal  
210 genome assembly and in turn, the specificity of our sub-chromosomal paints. For this, we again  
211 turned to pachytene chromosome spreads in the male germline, where the linear nature of  
212 chromosomes allowed us to verify the linear order of our probes. We started with the stripe sub-  
213 libraries, wherein selected chromosomes were sub-divided into 5 stripes approximately 3 Mb in size,  
214 or 13 stripes approximately 1.5 Mb in size, depending on the chromosome (Table 2 and Figure 1B).  
215 Only the first, middle, and last stripes were labeled with secondary oligos to visualize three stripes  
216 along each chromosome (Figure 1B, 3A, 3B; stripe 1, 2 and 3, respectively). FISH with these stripe  
217 paints for ch15 in pachytene spreads from larval testes revealed a singular focus for each stripe, with  
218 stripes 1, 2, and 3 positioned in the predicted order along the linear chromosome (Figure 3A). This  
219 was also true for ch23 and the Z chromosome (Figure 3B-C).

220 To test the specificity of our transcriptionally active and inactive chromatin domain paints, we  
221 labeled all three chromosomes with this barcode index (ch7, 15, and 16) at the same time on larval  
222 testes pachytene spreads. This revealed three separate linear chromosomes with distinct banding

223 patterns (Figure 3D) corresponding to the respective paint schematic (Figure 1 and 3D). Together,  
224 these results indicate that the intra-chromosomal assembly for these chromosomes is highly accurate  
225 and our paints are specific for their target chromosomal domains.

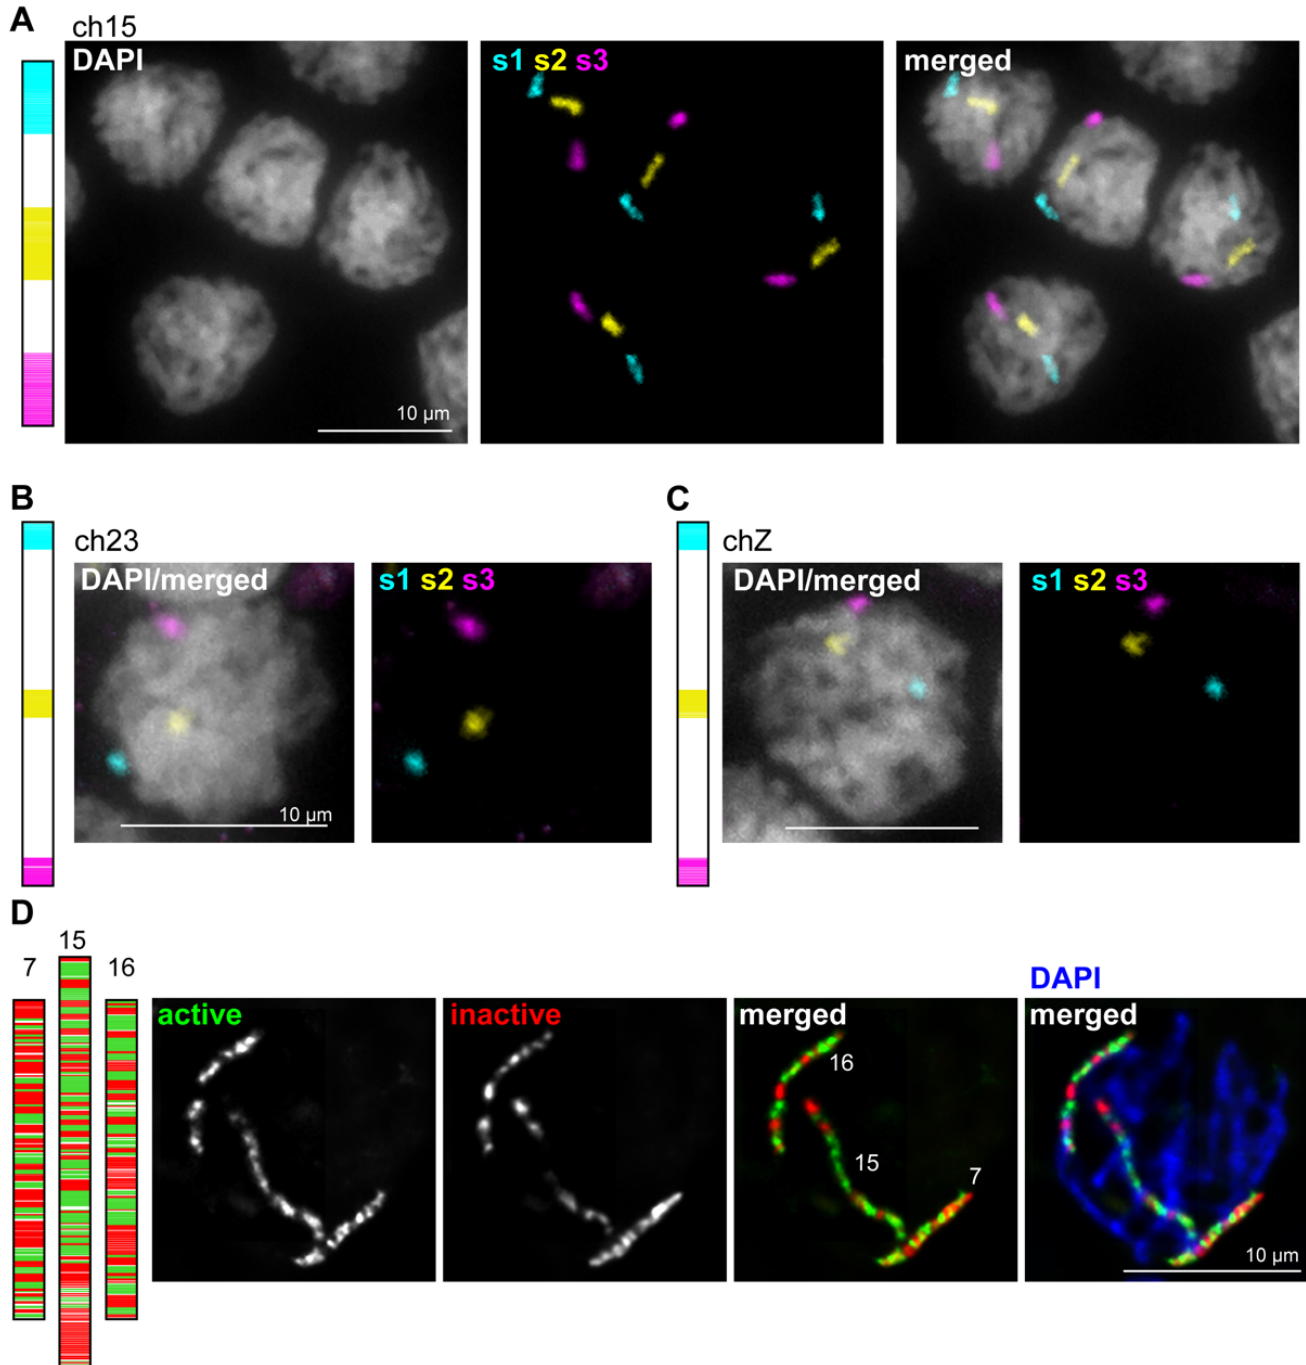

226

227 **Figure 3. Stripe and active/inactive chromosome paints in *B. mori* 5<sup>th</sup> instar testes squashes.**

228 A) Left: Schematic of stripe paints for ch15, with stripe 1 (s1) in cyan, stripe 2 (s2) in yellow,  
229 Right: Pachytene cells labeled with ch15 stripe paints. B-C) Left: Schematic of stripe paints for ch23 or chZ. Right:  
230 Representative pachytene nucleus labeled with stripe paints for ch23 or chZ. D) Left: Schematic of active/inactive paints  
231 for ch7, 15, and 16. Active domains are shown in green and inactive domains are shown in red. Right: Representative  
232 pachytene nucleus labeled with paints for all 3 chromosomes.



### 233 **Telomeres face poleward at random in metaphase I bivalents in testes**

234 In addition to identifying pachytene cells in our assays with the stripe paints in larval testes,  
235 we were able to identify cells in all stages of meiosis I up to metaphase I, as well as cells in interphase  
236 (Figure 4A). Interestingly, we noted that traditional cruciform bivalents are formed at metaphase I,  
237 and these bivalents are highly reminiscent of those seen in meiosis in the nematode *C. elegans*, with  
238 one telomere remaining paired and the other telomere facing poleward ((Figure 4B-D) reviewed in  
239 (44)). While this “telokinetic” chromosome configuration was previously hypothesized to occur in  
240 meiosis in *B. mori*, it has never before been directly observed.

241 We next wanted to determine if both telomeres of a chromosome can act as localized  
242 kinetochores during meiosis in *B. mori* or if one telomere preferentially faces poleward. In *C. elegans*,  
243 either telomere on any given chromosome can harbor kinetochore activity, and both do so at random  
244 depending on where crossovers form during meiotic prophase I (42,49). To test whether a similar  
245 mechanism occurs in *B. mori*, we examined metaphase I bivalents in larval testes using our stripe  
246 paints for chromosomes 15, 23, and Z. Quantification of which telomere remains paired and which  
247 telomere faces poleward (stripe 1 or stripe 3) revealed that approximately half of metaphase I cells  
248 harbor pairing in the stripe 1 domain and half harboring pairing in the stripe 3 domain for all tested  
249 chromosomes, including ch Z (Figure 4E). This finding suggests, like nematodes, *B. mori* telomere  
250 regions likely act as localized kinetochores during meiosis. Furthermore, the orientation of  
251 chromosomes in the bivalent is not pre-determined, with both telomeres having an equal probability  
252 of being either paired or facing poleward.

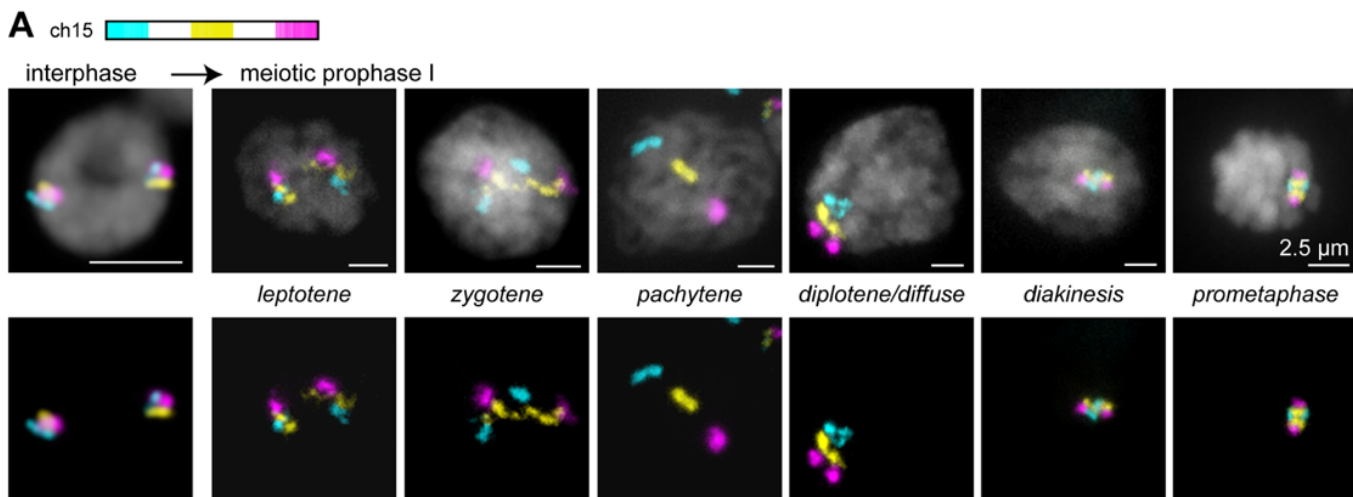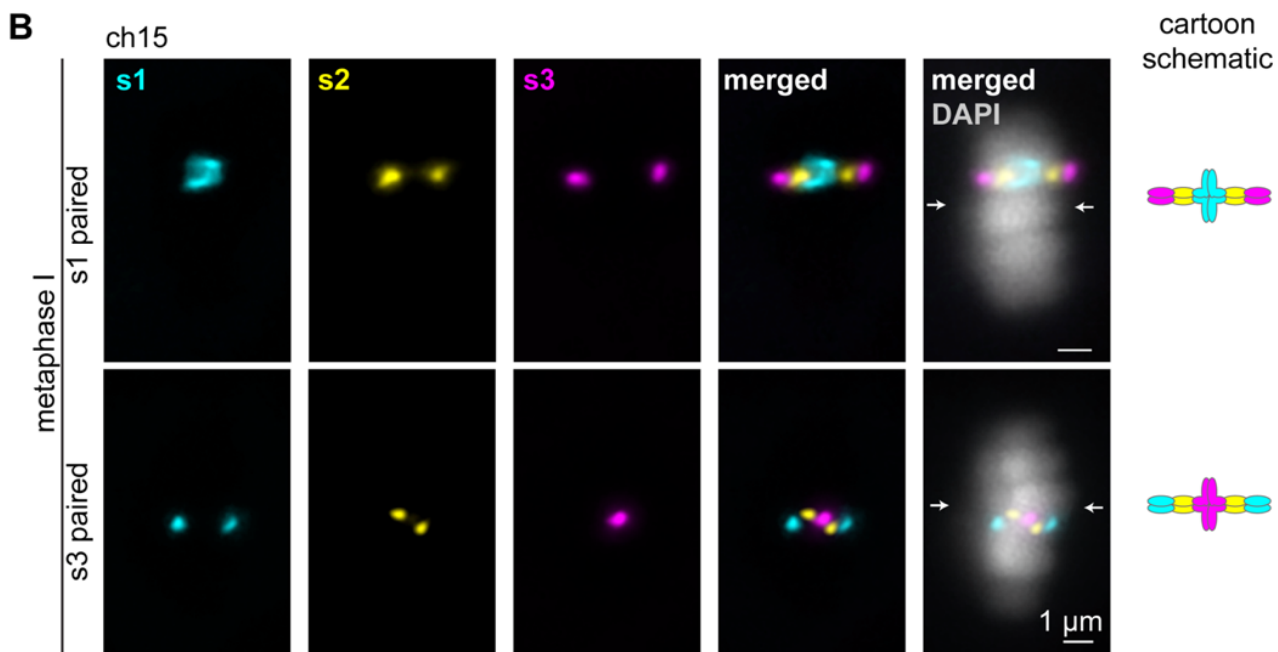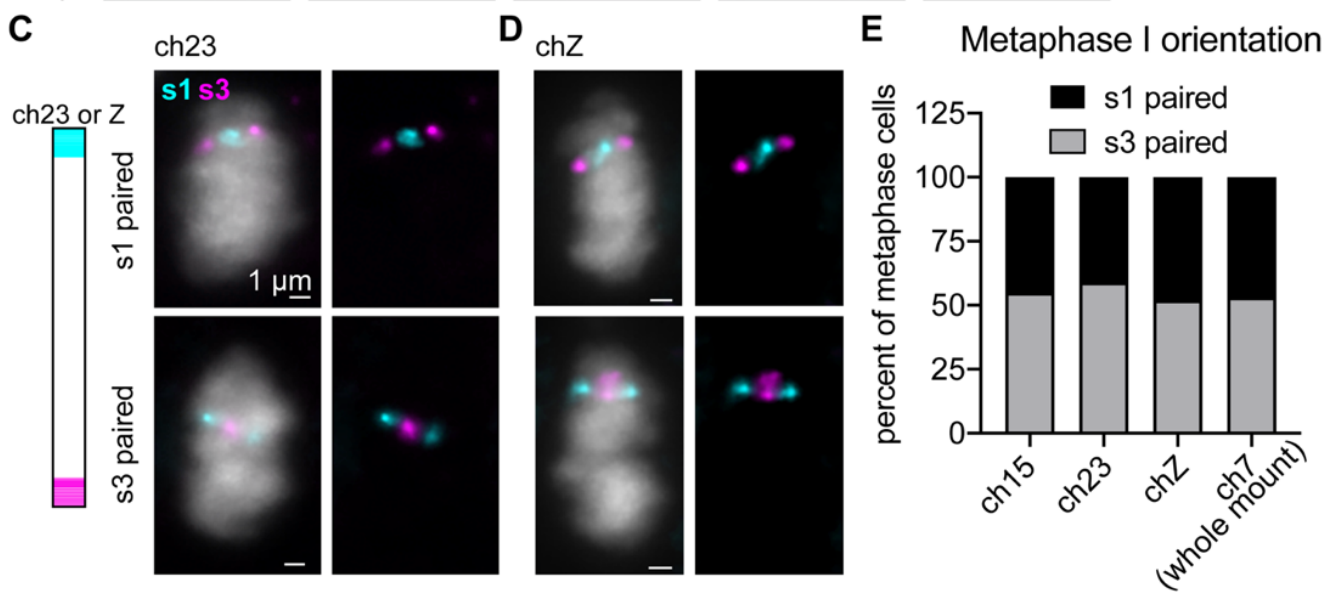

253

254

255 **Figure 4. Analysis of pairing and metaphase I bivalent formation in 5<sup>th</sup> instar larval testes squashes.**

256 A) Left: Schematic of stripe paints for ch15, with stripe 1 (s1) in cyan, stripe 2 (s2) in yellow, and stripe 3 (s3) in magenta.  
257 Right: representative nuclei at the designated stages labeled with ch15 stripe paints. When cells enter meiosis,  
258 chromosomes begin to decondense (leptotene) and homologs pair (zygotene). Pairing is complete by pachytene, with  
259 complete synapsis for crossing over, and chromosomes are linear. Chromosomes begin to condense for segregation in  
260 diplotene and diakinesis. DAPI is shown in gray. B) Metaphase I bivalents labeled with ch15 stripe paints. Top: bivalent  
261 with pairing in stripe 1 domain. Bottom: bivalent with pairing in stripe 3 domain. Schematics of bivalents shown on the  
262 right. C) Left: Schematic of stripe paints for ch23 or Z, showing only stripe 1 (cyan) and stripe 3 (magenta). Right:  
263 representative metaphase I cells showing pairing in the s1 domain (top) or s3 domains (bottom) for ch23. D)  
264 Representative metaphase I cells showing pairing in the s1 domain (top) or s3 domains (bottom) for chZ. E) Quantification  
265 of metaphase I orientation for ch15, 23, Z, and 7 (from whole-mount larval testes). Ch15, n=182 (45% s1 paired). Ch23,  
266 n=144 (41% s1 paired). ChZ, n=169 (48% s1 paired). Ch7, n=96 (47% s1 paired). Each FISH assay was performed on a  
267 different larva.

268  
269  
270 To further validate this finding, we repeated the experiment using chromosome 7 stripe paints  
271 in whole mount late 5<sup>th</sup> instar larval testes (Figure S8). As we predicted based on our testes squashes  
272 and previous studies (54), 5<sup>th</sup> instar larval testes harbor mitotic cells with unpaired homologs that  
273 highly resemble mitotic cells seen in whole-mount embryos (Figure 5A-B; Figure S9) and primary  
274 spermatocytes at all stages of meiosis I (Figure 5A-D). Interestingly, *B. mori* and other Lepidopteran  
275 insects utilize two distinct spermatogenic pathways, ultimately resulting in apyrene (without nuclei)  
276 and eupyrene (with nuclei) sperm (65–71). In whole-mount testes, we were clearly able to identify  
277 eupyrene secondary spermatocyte bundles (Figure 5C-3) and mature eupyrene sperm (Figures S10  
278 and S11). Additionally, we identified secondary spermatocyte bundles appearing to be apyrene-  
279 destined, where some cells have no DNA and the FISH signal is instead diffuse in the cytoplasm,  
280 suggesting that the cells in these bundles are beginning the process of nuclear degradation (Figure  
281 5C-4). Importantly, quantification of metaphase I bivalent formation in whole mount testes was  
282 completely in agreement with our findings from squashes, showing ch7 stripe 1 paired in 46.9% of  
283 cells and ch7 stripe 3 paired in 53.1% (Figure 4E). Together, these findings suggest that *B. mori*  
284 chromosomes form traditional bivalent structures at metaphase I with localized centromere activity  
285 restricted to one telomeric region at random.

286

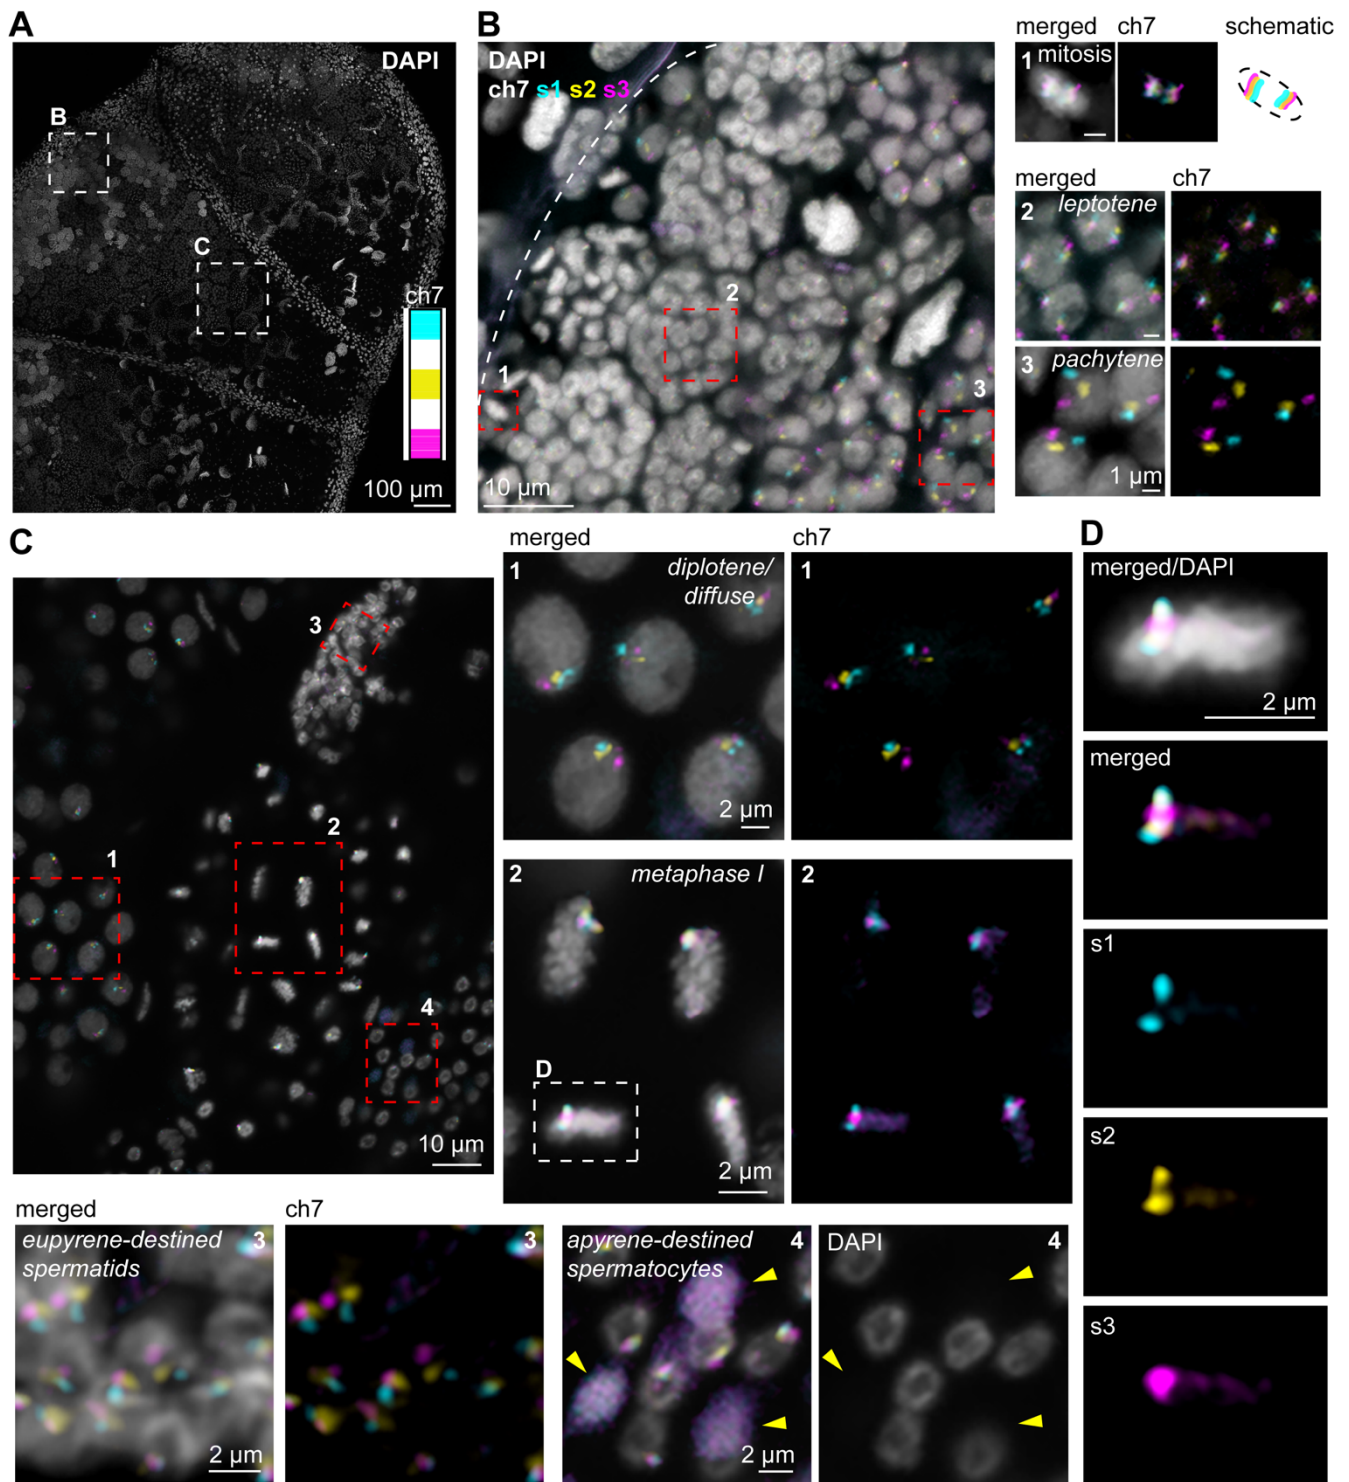

287

288 **Figure 5. FISH with stripe chromosome paints in whole mount 5<sup>th</sup> instar larval testes.**

289 A) 5<sup>th</sup> instar larval testis stained with DAPI. Boxes indicate subsequent panels as indicated. Inset: ch7 stripe paints used in  
290 B-D. B) Zoom of mitotic and pachytene region of larval testes as shown in A, labeled with ch7 stripe paints. Red boxes  
291 indicate zooms shown to the right. 1) mitotic cells – chromosomes condensed, homologs unpaired, and aligned at the  
292 metaphase plate. Note how chromosomes are compacted perpendicular to the metaphase plate. 2) leptotene cells,  
293 chromosomes are slightly decondensed and homologs are unpaired. 3) pachytene cells, chromosomes are paired head-to-  
294 tail and linear. C) Zoom of late prophase/metaphase I region of larval testis as shown in A, labeled with ch7 stripe paints.  
295 Red boxes indicate zooms shown to the right and below. 1) diplotene cells (diffuse stage), chromosomes are still paired  
296 and beginning to condense. Left: merged with DAPI in gray. Right: ch7 stripe 1 in cyan, stripe 2 in yellow, and stripe 3 in

297 magenta. 2) metaphase I cells labeled with ch7 stripe paints. White box indicates zoom shown in D. Left: merged with  
298 DAPI in gray. Right: stripe 1 (cyan) and stripe 3 (magenta) paints. 3) eupyrene-destined secondary spermatocyte bundle.  
299 Left: merged ch7 stripe paints with DAPI in gray. Right: ch7 stripe paints, stripe 1 (cyan) and stripe 3 (magenta). 4)  
300 apyrene-destined secondary spermatocyte bundle. Left: merged ch7 stripe paints with DAPI in gray. Right: DAPI. Yellow  
301 arrowheads indicate spermatocytes that have already undergone nuclear degradation. Scale bar = 2 um for all panels 1-4.  
302 D) Zoom of metaphase I cell indicated in C-2. Top: merged with DAPI in gray. Bottom: ch7 stripe 1 (cyan), stripe 2 (yellow),  
303 and stripe 3 (magenta) paints. Bivalent pairing is in stripe 3 domain in this cell. Note: zoomed fields for all panels may  
304 display a slightly different Z position than the larger field views.  
305

### 306 **Chromosome-wide homolog pairing is persistent in *B. mori* female larval ovaries**

308 In contrast to what we and others have observed in *B. mori* males, homolog pairing in *B. mori*  
309 females is reported to be unconventional, without chiasma formation and with the SC transforming  
310 into “elimination chromatin” over one micron in width (54,57–59). Despite these previous  
311 observations, we found that a significant number of nuclei with homologs entirely paired in meiotic  
312 chromosome spreads from late 4<sup>th</sup>/early 5<sup>th</sup> instar larvae (Figure 2 and S5). This finding led us to  
313 wonder whether homolog pairing is more stable in *B. mori* female meiosis than previously  
314 appreciated. Like *Drosophila*, the *B. mori* larval ovary is composed of polytrophic meroistic ovarioles  
315 containing linear arrays of developing egg chambers, with the tip (germarium) harboring germ line  
316 stem cells that are mitotically dividing and the most mature chambers being the most distal from the  
317 stem cell niche ((62,72,73), Figure 6A and Figure S12). However, as moths have a much shorter adult  
318 lifespan than flies (only 5-7 days for silkmoths versus 2-3 months for *Drosophila*), the majority of  
319 oogenesis occurs in the larval and pupal stages (62).

320 To determine how long homologs remain paired end-to-end in meiotic prophase in females,  
321 we performed whole-mount DNA FISH with ch7 stripe paints in 5<sup>th</sup> instar larval ovaries. This approach  
322 yielded robust FISH signal throughout the developing egg chambers and in the germarium (Figure 6).  
323 In agreement with our initial observations from ovary squashes, we observed that all cells in the  
324 germarium harbor paired, linear homologs through early pachytene (Figure 6A-B). Interestingly, ch7  
325 homologs were still paired end-to-end in late pachytene, where nurse cells and the developing



326 oocytes begin to differentiate (Figure 6C). The majority of oocytes in the developing egg chambers  
327 outside the germarium in 5<sup>th</sup> instar larvae are arrested in late diakinesis or metaphase I (57), which  
328 should be after transformation of the SC at the end of pachytene. Surprisingly, we observed that  
329 chromosome-wide pairing persists in all oocytes present in developing egg chambers throughout the  
330 length of the 5<sup>th</sup> instar larval ovarioles (Figure 6C-D). This finding suggests that, even in the absence of  
331 chiasma and with the partial breakdown and transformation of the SC, end-to-end pairing persists  
332 throughout meiotic prophase I in female *B. mori*. Altogether, these studies using Oligopaints in *B.*  
333 *mori* larval ovaries and testes demonstrate that this FISH-based approach is highly successful in both  
334 squashed and whole tissue and can be used to study chromosome dynamics throughout different  
335 stages of meiosis.

336

337

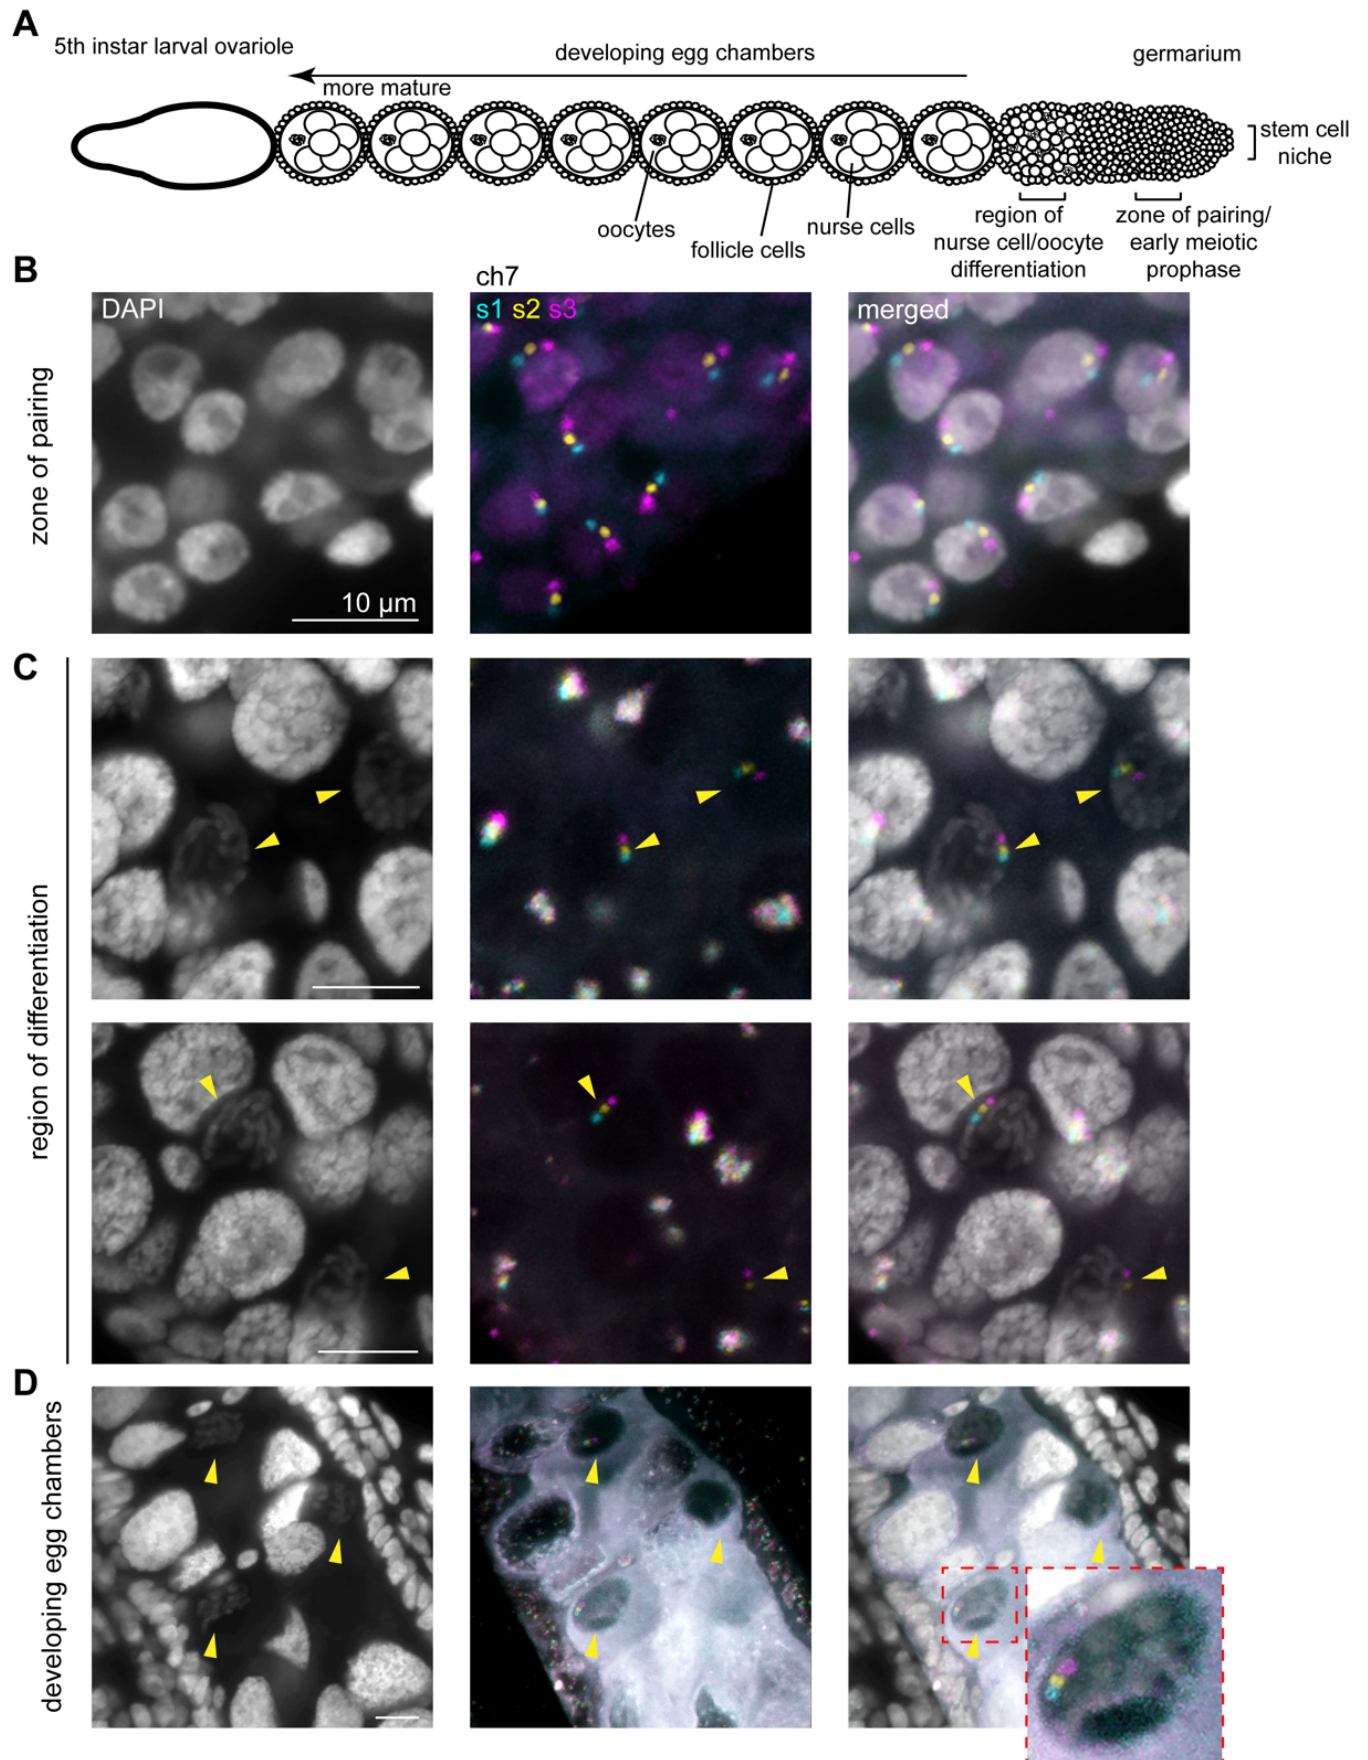

338

339

340 **Figure 6. FISH with stripe chromosome paints in whole mount 5<sup>th</sup> instar larval ovary.**

341 A) Schematic of ovariole from 5<sup>th</sup> instar *B. mori* larval ovary. B) Representative pachytene nuclei from germarium of larval  
342 ovary labeled with ch7 stripe paints. C) Representative fields showing early oocytes and early nurse cells labeled with ch7  
343 stripe paints. Yellow arrowheads indicate oocytes. Chromosome wide pairing is still present in oocytes at this stage. D)  
344 Representative image showing mature (~stage 5) egg chambers. Yellow arrowheads indicate oocytes. Chromosome wide  
345 pairing is still present in oocytes at this late prophase stage.  
346  
347

348 **Discussion**

349 The silkworm, *B. mori*, has been a model system for studying meiotic chromosomes for  
350 decades. Like *Drosophila*, silkworms are readily reared in a laboratory setting and highly amenable to  
351 genetic manipulations including RNAi and CRISPR. However, unlike fruit flies, silkworms are large in  
352 size, combining the increased ease of dissection and structure visualization commonly associated  
353 with mammals with the short generation time of an insect system. Additionally, the large amount of  
354 tissue provided by *B. mori* increases the feasibility of genomics assays and other cell population-  
355 based approaches, which require a large number of cells. Importantly, the recent sequencing of the *B.*  
356 *mori* genome revealed that there is a high degree of sequence homology between silkworm genes  
357 and mammalian disease genes (61,74–76). Furthermore, *Bombyx* represents an excellent insect  
358 model system for studying meiosis, as SC constituents in non-Drosophilid arthropods are closely  
359 aligned with vertebrates, while *Drosophila* harbor a unique suite of SC factors (77,78). Finally, *B. mori*  
360 harbor 28 chromosomes while humans have 23 (and *Drosophila* have only 4), and our studies along  
361 with others have illustrated that homologs remain unpaired in *B. mori* somatic cells (79). This is in  
362 stark contrast to the high levels of somatic homolog pairing seen in *Drosophila* (80,81), making the  
363 study of *B. mori* genome dynamics more directly relevant to human biology.

364 Here, we take advantage of the *B. mori* model system to visualize single chromosome  
365 dynamics in meiosis using the Oligopaints technology. As previously described for *C. elegans*, we have  
366 utilized the flexibility and scalability of the Oligopaint design process to add chromosome-specific



367 barcodes to label either whole chromosomes or different sub-chromosomal loci using the same set of  
368 oligos (19). Using these multiplexed Oligopaints, we have provided the first extensive characterization  
369 of single, whole chromosomes in meiosis in both males and females in any species. Our studies show  
370 in great detail how chromosomes in larval testes condense, pair, and partially unpair to form  
371 metaphase I cruciform bivalents. While crossing over has been reported in male meiosis in *B. mori*  
372 (53,57), clear chiasmata were not apparent in post-pachytene spermatocytes using our imaging  
373 approach (Figure 2, 4, 5). We think this inability to detect chiasmata is likely due to the small size and  
374 compact nature of *B. mori* chromosomes in diplotene.

375         We show that mitotic chromosomes in *B. mori*, which are holocentric in structure, align  
376 parallel to the metaphase plate, with both telomeres being aligned with the plate and homologs  
377 being unpaired. Our studies further reveal that, like those in *C. elegans*, *B. mori* chromosomes do not  
378 retain the holocentric configuration in meiosis. Instead, meiotic chromosomes at metaphase I in  
379 spermatogenesis align perpendicular to the metaphase plate such that telomeric regions face the  
380 spindle poles and likely act as localized kinetochores. Moreover, we demonstrate that both telomeres  
381 are equally likely to face poleward and harbor kinetochore activity. A similar telokinetic approach to  
382 meiosis has also been observed in the holocentric milkweed bug *Oncopeltus fasciatus* (82) and the  
383 kissing bug *Triatoma infestans* (83). Whether crossover position dictates bivalent structure in *B. mori*  
384 or other holocentric insects, as in *C. elegans* (42,46,49–51), remains to be explored. Additionally, how  
385 the meiotic spindle attaches to *B. mori* chromosomes and what kinetochore proteins are involved is  
386 yet to be determined, although electron microscopy studies have suggested that microtubules  
387 directly penetrate the poleward surface of chromosomes during spermatogenesis (52). Interestingly,  
388 the broadly conserved centromere-specific histone H3 variant CENP-A is absent from the genome of  
389 Lepidopteran insects (56), suggesting that both mitotic and meiotic chromosome segregation in  
390 *Bombyx* are independent of CENP-A.

391 We determine that chromosome-wide pairing in *B. mori* female meiosis is more stable than  
392 previously appreciated and persists throughout the entirety of meiotic prophase. How chromosomes  
393 remain paired end-to-end, even after loss of the central elements of the SC and through SC  
394 transformation, remains unclear. Finally, in addition to demonstrating the feasibility of using  
395 Oligopaints to study meiotic chromosomes, our studies illustrate that Oligopaints can be designed for  
396 species with draft genome assemblies and that the Oligopaints can in turn be used to validate both  
397 inter- and intra-chromosome level genome assemblies.

398

## 399 **Materials and Methods**

### 400 ***B. mori* strains and cell line**

401 Embryos were obtained from Carolina Biological (Burlington, NC), Coastal Silkworms  
402 (Jacksonville, FL), Mulberry Farms (Fallbrook, CA), or were freshly laid in the lab from larvae derived  
403 from embryos from these sources. Some larvae were obtained from Rainbow Mealworms (Compton,  
404 CA). Embryos were kept at 4°C for less than 1 month. For rearing, embryos were transferred to 28°C  
405 and larvae were fed fresh mulberry leaves or powdered mulberry chow (Carolina Biological or  
406 Rainbow Mealworms). BmN4 cells are commercially available from ATCC (Manassas, VA).

407

### 408 **Oligopaint design and synthesis**

409 Oligopaint libraries were designed as described in the main text. Active and inactive domains  
410 were determined primarily based on CENP-T depletion or enrichment. CENP-T ChIP-seq profiles were  
411 obtained from BmN4 cells and domains were called as previously described (37) with the following  
412 modifications: CENP-T ChIP-seq signal originally in 10 kb windows was averaged over 50 kb.  
413 Subsequently, negative CENP-T domains were subtracted from positive CENP-T domains to obtain

414 final CENP-T depleted domains. As previously observed, domains enriched for CENP-T were shown to  
 415 strongly correlate with enrichment for the repressive histone mark H3K27me3, while domains  
 416 depleted of CENP-T were shown to strongly correlate with enrichment of the active chromatin marks  
 417 H3K4me3 and H3K36me3. All information regarding genomic coordinates for Oligopaints and probe  
 418 density can be found in Tables 1-5. Oligo pools were purchased from CustomArray/GenScript  
 419 (Redmond, WA; ch 7, 15, 16) or Twist Biosciences (San Francisco, CA; ch 4, 17, 23, Z). Oligopaints  
 420 were synthesized as previously described by adding barcodes to each oligo for PCR-based  
 421 amplification (17,30,84).

422

423 **Table 1. Chromosome and chromosome paint information**

424

| Chrom. | chromosome size (bp) | size painted (bp) | paint start | paint stop | density (probes/kb) | total # of oligos |
|--------|----------------------|-------------------|-------------|------------|---------------------|-------------------|
| 4      | 18737234             | 18639239          | 282         | 18639521   | 1.5                 | 26841             |
| 7      | 13944894             | 13868845          | 35931       | 13904776   | 3                   | 42625             |
| 15     | 18440292             | 18354755          | 21089       | 18375844   | 1                   | 17756             |
| 16     | 14337292             | 14275583          | 27737       | 14303320   | 1.5                 | 20190             |
| 17     | 16840672             | 16806551          | 9415        | 16815966   | 1.5                 | 23834             |
| 23     | 21465692             | 21339065          | 123188      | 21462253   | 1.5                 | 30506             |
| Z (1)  | 20666287             | 20578020          | 37936       | 20615956   | 1.5                 | 29784             |

425

426

427 **Table 2. Stripe sub-library paint information**

428

| Chrom. and stripe | paint start | paint stop | Stripe size (Mb) |
|-------------------|-------------|------------|------------------|
| 7 stripe 1        | 35931       | 2809682    | 2.77             |
| 7 stripe 2        | 5587874     | 8357288    | 2.76             |
| 7 stripe 3        | 11131025    | 13904776   | 2.77             |
| 15 stripe 1       | 21089       | 3684775    | 3.66             |
| 15 stripe 2       | 7380341     | 11061106   | 3.68             |
| 15 stripe 3       | 14748412    | 18375844   | 3.62             |
| 23 stripe 1       | 123188      | 1638259    | 1.51             |
| 23 stripe 2       | 9909172     | 11556867   | 1.65             |
| 23 stripe 3       | 19815237    | 21462253   | 1.65             |
| Z stripe 1        | 37936       | 1589202    | 1.55             |
| Z stripe 2        | 9538407     | 11119201   | 1.58             |
| Z stripe 3        | 19078122    | 20615956   | 1.53             |

429  
430

**Table 3. Ch7 Active and inactive chromatin domains paint information**

| Domain   | Start    | Stop     | Size (bp) |
|----------|----------|----------|-----------|
| inactive | 35931    | 800000   | 764070    |
| active   | 800001   | 900000   | 100000    |
| inactive | 1000001  | 1100000  | 100000    |
| active   | 1100001  | 1250000  | 150000    |
| inactive | 1300001  | 1500000  | 200000    |
| active   | 1500001  | 1600000  | 100000    |
| inactive | 1600001  | 1700000  | 100000    |
| active   | 1700001  | 1850000  | 150000    |
| inactive | 1850001  | 1900000  | 50000     |
| active   | 1950001  | 2000000  | 50000     |
| inactive | 2000001  | 2300000  | 300000    |
| inactive | 2400001  | 2600000  | 200000    |
| active   | 2600001  | 2700000  | 100000    |
| inactive | 2700001  | 3350000  | 650000    |
| active   | 3400001  | 3650000  | 250000    |
| inactive | 3650001  | 3900000  | 250000    |
| active   | 3900001  | 4000000  | 100000    |
| inactive | 4000001  | 4550000  | 550000    |
| active   | 4550001  | 4650000  | 100000    |
| inactive | 4650001  | 4950000  | 300000    |
| active   | 4950001  | 5400000  | 450000    |
| inactive | 5450001  | 5800000  | 350000    |
| active   | 5900001  | 6050000  | 150000    |
| inactive | 6050001  | 6250000  | 200000    |
| inactive | 6300001  | 6450000  | 150000    |
| active   | 6450001  | 6550000  | 100000    |
| inactive | 6550001  | 6650000  | 100000    |
| active   | 6700001  | 6800000  | 100000    |
| active   | 6850001  | 7150000  | 300000    |
| inactive | 7150001  | 7400000  | 250000    |
| active   | 7400001  | 7600000  | 200000    |
| inactive | 7600001  | 7900000  | 300000    |
| active   | 7950001  | 8200000  | 250000    |
| inactive | 8250001  | 8750000  | 500000    |
| inactive | 8800001  | 9050000  | 250000    |
| active   | 9050001  | 9300000  | 250000    |
| inactive | 9350001  | 9400000  | 50000     |
| active   | 9400001  | 9550000  | 150000    |
| inactive | 9650001  | 10800000 | 1150000   |
| active   | 10850001 | 11100000 | 250000    |
| active   | 11150001 | 11400000 | 250000    |
| inactive | 11400001 | 11650000 | 250000    |
| active   | 11650001 | 11950000 | 300000    |
| inactive | 11950001 | 12300000 | 350000    |
| active   | 12300001 | 12600000 | 300000    |
| inactive | 12600001 | 12700000 | 100000    |
| active   | 12700001 | 12750000 | 50000     |
| inactive | 12800001 | 12950000 | 150000    |
| active   | 12950001 | 13150000 | 200000    |
| inactive | 13150001 | 13250000 | 100000    |
| active   | 13350001 | 13450000 | 100000    |

|          |          |          |        |
|----------|----------|----------|--------|
| inactive | 13500001 | 13650000 | 150000 |
| active   | 13700001 | 13849955 | 149955 |

431  
432  
433  
434

**Table 4. Ch15 Active and inactive chromatin domains paint information**

| Domain   | Start    | Stop     | Size (bp) |
|----------|----------|----------|-----------|
| inactive | 21089    | 200000   | 178912    |
| active   | 250001   | 850000   | 600000    |
| active   | 900001   | 1000000  | 100000    |
| inactive | 1000001  | 1400000  | 400000    |
| active   | 1400001  | 1950000  | 550000    |
| inactive | 1950001  | 2250000  | 300000    |
| active   | 2250001  | 2550000  | 300000    |
| inactive | 2550001  | 2800000  | 250000    |
| active   | 2850001  | 3200000  | 350000    |
| inactive | 3200001  | 3500000  | 300000    |
| active   | 3550001  | 3850000  | 300000    |
| inactive | 3850001  | 3900000  | 50000     |
| active   | 3950001  | 4100000  | 150000    |
| inactive | 4100001  | 4250000  | 150000    |
| active   | 4250001  | 4350000  | 100000    |
| inactive | 4350001  | 4650000  | 300000    |
| active   | 4650001  | 4750000  | 100000    |
| inactive | 4750001  | 4950000  | 200000    |
| inactive | 5000001  | 5150000  | 150000    |
| active   | 5150001  | 5250000  | 100000    |
| inactive | 5300001  | 5350000  | 50000     |
| active   | 5350001  | 6100000  | 750000    |
| inactive | 6100001  | 6200000  | 100000    |
| active   | 6250001  | 6500000  | 250000    |
| inactive | 6500001  | 6700000  | 200000    |
| active   | 6700001  | 6850000  | 150000    |
| inactive | 6900001  | 7100000  | 200000    |
| active   | 7100001  | 7300000  | 200000    |
| inactive | 7300001  | 7550000  | 250000    |
| active   | 7550001  | 7800000  | 250000    |
| inactive | 7800001  | 8100000  | 300000    |
| active   | 8100001  | 8300000  | 200000    |
| inactive | 8400001  | 8650000  | 250000    |
| active   | 8650001  | 8750000  | 100000    |
| inactive | 8750001  | 8800000  | 50000     |
| active   | 8850001  | 8900000  | 50000     |
| inactive | 8900001  | 9100000  | 200000    |
| active   | 9100001  | 9500000  | 400000    |
| inactive | 9500001  | 9550000  | 50000     |
| active   | 9600001  | 9750000  | 150000    |
| active   | 9800001  | 9950000  | 150000    |
| inactive | 10000001 | 10500000 | 500000    |
| active   | 10500001 | 11200000 | 700000    |
| active   | 11350001 | 11400000 | 50000     |
| inactive | 11400001 | 11500000 | 100000    |
| active   | 11500001 | 11950000 | 450000    |

|          |          |          |         |
|----------|----------|----------|---------|
| inactive | 11950001 | 12000000 | 50000   |
| active   | 12050001 | 12200000 | 150000  |
| inactive | 12200001 | 12250000 | 50000   |
| active   | 12300001 | 12500000 | 200000  |
| inactive | 12500001 | 12600000 | 100000  |
| active   | 12600001 | 12850000 | 250000  |
| inactive | 12850001 | 12950000 | 100000  |
| active   | 12950001 | 13400000 | 450000  |
| inactive | 13450001 | 13600000 | 150000  |
| active   | 13650001 | 13750000 | 100000  |
| inactive | 13750001 | 14150000 | 400000  |
| inactive | 14200001 | 14850000 | 650000  |
| active   | 14900001 | 15050000 | 150000  |
| inactive | 15100001 | 15250000 | 150000  |
| active   | 15300001 | 15500000 | 200000  |
| inactive | 15550001 | 15600000 | 50000   |
| active   | 15600001 | 15750000 | 150000  |
| inactive | 15750001 | 16000000 | 250000  |
| inactive | 16050001 | 16350000 | 300000  |
| inactive | 16400001 | 17850000 | 1450000 |
| inactive | 17900001 | 18100000 | 200000  |
| active   | 18150001 | 18200000 | 50000   |
| inactive | 18200001 | 18250000 | 50000   |
| active   | 18300001 | 18350000 | 50000   |
| inactive | 18350001 | 18375844 | 25844   |

435  
436  
437  
438

**Table 5. Ch16 Active and inactive chromatin domains paint information**

| Domain   | Start   | Stop    | Size (bp) |
|----------|---------|---------|-----------|
| inactive | 27737   | 50000   | 22264     |
| active   | 50001   | 150000  | 100000    |
| inactive | 150001  | 250000  | 100000    |
| active   | 250001  | 350000  | 100000    |
| inactive | 350001  | 650000  | 300000    |
| active   | 700001  | 1350000 | 650000    |
| inactive | 1400001 | 1700000 | 300000    |
| active   | 1700001 | 2300000 | 600000    |
| inactive | 2300001 | 2400000 | 100000    |
| active   | 2400001 | 2700000 | 300000    |
| inactive | 2700001 | 3200000 | 500000    |
| active   | 3200001 | 3600000 | 400000    |
| inactive | 3600001 | 4050000 | 450000    |
| active   | 4050001 | 4200000 | 150000    |
| inactive | 4200001 | 4500000 | 300000    |
| active   | 4500001 | 4600000 | 100000    |
| active   | 4700001 | 4750000 | 50000     |
| inactive | 4750001 | 4800000 | 50000     |
| active   | 4900001 | 4950000 | 50000     |
| active   | 5000001 | 5250000 | 250000    |
| inactive | 5250001 | 5600000 | 350000    |
| active   | 5600001 | 6000000 | 400000    |
| inactive | 6000001 | 6150000 | 150000    |
| active   | 6200001 | 6250000 | 50000     |

|          |          |          |         |
|----------|----------|----------|---------|
| active   | 6300001  | 6500000  | 200000  |
| active   | 6550001  | 6650000  | 100000  |
| inactive | 6650001  | 6850000  | 200000  |
| active   | 6850001  | 7000000  | 150000  |
| inactive | 7050001  | 7950000  | 900000  |
| inactive | 8000001  | 8500000  | 500000  |
| active   | 8550001  | 8750000  | 200000  |
| inactive | 8800001  | 8900000  | 100000  |
| active   | 8900001  | 9400000  | 500000  |
| inactive | 9400001  | 9450000  | 50000   |
| active   | 9500001  | 10100000 | 600000  |
| inactive | 10100001 | 11450000 | 1350000 |
| active   | 11450001 | 11550000 | 100000  |
| inactive | 11550001 | 11900000 | 350000  |
| active   | 11950001 | 12250000 | 300000  |
| inactive | 12250001 | 12400000 | 150000  |
| active   | 12400001 | 12500000 | 100000  |
| inactive | 12500001 | 12700000 | 200000  |
| active   | 12750001 | 13200000 | 450000  |
| inactive | 13250001 | 13800000 | 550000  |
| active   | 13800001 | 14100000 | 300000  |
| inactive | 14100001 | 14303320 | 203320  |

439

440

#### 441 **Preparation of meiotic chromosome spreads and DNA FISH**

442 For meiotic squashes, late 4<sup>th</sup> instar or early 5<sup>th</sup> instar larvae (approximately 3 inches in length)  
443 were sacrificed by decapitation. The caterpillars were then cut open anterior to posterior and fileted  
444 on a silicone dissecting dish using standard sewing needles. Gonads were harvested using forceps and  
445 placed into 1.5 mL tubes containing SF900 tissue culture media. Gonads were then rinsed thrice in 1X  
446 PBS, then incubated in 1X PBS+0.5% sodium citrate for 8-10 min. Using forceps, gonads were then  
447 transferred to siliconized coverslips (1 gonad per coverslip) and covered with ~10  $\mu$ L of 45% acetic  
448 acid/1% PFA/1X PBS and fixed for 6 min. Using a poly-L-lysine coated glass slide, gonads were then  
449 physically squashed and slide/coverslip were flash frozen in liquid nitrogen. After carefully removing  
450 slides from liquid nitrogen, coverslips were removed with a razor blade, and slides were post-fixed in  
451 cold (pre-chilled to -20°C) 3:1 methanol:glacial acetic acid for 10 min. After fixation, slides were  
452 washed thrice in 1X PBS and subjected to an ethanol row at -20°C (70%, 90%, 100% ethanol, 5 min  
453 each) before drying completely at room temp. Slides were dried for 24-72 h.

454 FISH on meiotic squashes was performed as previously described for mitotic spreads (31).  
455 Briefly, after drying slides, slides were denatured at 72°C for 2.5 min in 2xSSCT/70% formamide  
456 before again drying with an ethanol row at -20°C. Slides were then left to air dry for 10 min at room  
457 temperature. Primary Oligopaint probes were resuspended in hybridization buffer (10% dextran  
458 sulfate/2xSSCT/50% formamide/4% polyvinylsulfonic acid), placed on slides, covered with a coverslip,  
459 and sealed with rubber cement. Slides were denatured on a heat block in a water bath set to 92°C for  
460 2.5 min, after which slides were transferred to a humidified chamber and incubated at 37°C  
461 overnight. The next day, coverslips were removed using a razor blade and slides were washed as  
462 follows: 2xSSCT at 60°C for 15 min, 2xSSCT at RT for 15 min, and 0.2xSSC at RT for 5 min.  
463 Fluorescently labeled secondary probes were then added to slides, again resuspended in  
464 hybridization buffer, covered with a coverslip, and sealed with rubber cement. Slides were incubated  
465 at 37°C for 2 h in a humidified chamber, before repeating the above washes. All slides were stained  
466 DAPI and mounted in Prolong Diamond (Invitrogen/ThermoFisher, Waltham, MA). Slides were cured  
467 overnight before sealing with clear nail polish and imaging.

468

#### 469 **FISH on whole-mount gonads and embryos**

470 For whole-mount DNA FISH in gonads, ovaries and testes from late 5<sup>th</sup> instar larvae (after  
471 secession of eating) were dissected in SF900 cell culture media, washed thrice briefly with 1X PBS,  
472 and then fixed for 30 min in 4% PFA in PBS with 0.1% Triton-X-100 (0.1% PBS-T) at RT. Gonads were  
473 then washed again thrice in 1X PBS and permeabilized with 0.5% PBS-T for 15 min at RT. Gonads were  
474 pre-denatured by washing as follows: 2xSSCT for 10 min at RT, 2xSSCT/20% formamide for 10 min at  
475 RT, 2xSSCT/50% formamide for 10 min at RT, 2xSSCT/50% formamide for 3 h at 37°C, 2xSSCT/50%  
476 formamide for 3 min at 92°C, 2xSSCT/50% formamide for 20 min at 60°C. To the 2xSSCT/50%  
477 formamide, 100 pmol of each probe was directly added. Gonads were then denatured at for 3 min at



478 92°C and incubated overnight at 37°C. The next day, gonads were washed: 3x 30 min each in  
479 2xSSCT/50% formamide at 37°C, 1x 15 min in 2xSSCT at RT. 20 pmol of each secondary oligo was  
480 added with 50% formamide and incubated for 3 h at 37°C. Final washes were performed (2x 30 min in  
481 2xSSCT/50% formamide at 37°C, 1x 10 min in 2xSSCT/50% formamide at RT, 1x 10 min in 2xSSCT/20%  
482 formamide at RT, 1x 10 min in 2xSSCT at RT), gonads were stained with DAPI, and mounted on slides  
483 with Prolong Diamond (Invitrogen/ThermoFisher).

484 For whole-mount embryo FISH, diapausing embryos were removed from 4°C and kept at RT  
485 for 3-5 d. Chorions were weakened by soaking in 50% bleach for 15 min and then manually removed  
486 with forceps. Embryos were subsequently fixed for 30 min in 4% PFA in 0.1% PBS-T at RT, and FISH  
487 was performed as described above for whole-mount gonads.

488

#### 489 **Meiotic staging**

490 Stages of meiosis were determined based largely on DAPI morphology and/or cell position in  
491 whole-mount gonads. Late 4<sup>th</sup>-early 5<sup>th</sup> instar male larvae were used for squashes as they only  
492 possess primary spermatocytes in meiosis I. In whole-mount testes, meiosis I and II were  
493 distinguished based on position in the gonad and based on the number of cells per bundle (with  
494 meiosis I bundles harboring approximately 64 cells and meiosis II bundles harboring approximately  
495 128 cells).

496

#### 497 **Mitotic spreads from BmN4 cells**

498 To induce mitotic arrest, approximately  $1 \times 10^5$  cells were treated with 0.5 µg/mL Colcemid  
499 Solution (Gibco/ThermoFisher) for 2 h in a 28°C heat block. Cells were then spun for 5 min at 600 x g  
500 at room temperature to pellet and resuspended in hypotonic solution (500 mL of 0.5% sodium  
501 citrate). Cells were incubated in hypotonic solution for 8 min. 100 µL of the cell suspension were then

502 placed in a cytofunnel and spun at 1200 rpm for 5 min with high acceleration using a cytocentrifuge  
503 (Shandon Cytospin 4; ThermoFisher). For FISH, slides were then fixed in cold 3:1 methanol: acetic acid  
504 for 10 min and washed 3 times for 5 min in PBS-T (PBS with 0.1% Triton X-100). FISH was performed  
505 as described above for meiotic spreads.

506

### 507 **Imaging, quantification, and data analysis**

508 Images of meiotic squashes were acquired on a Leica DMI6000 wide-field inverted  
509 fluorescence microscope using an HCX PL APO 63x/1.40-0.60 Oil objective (Leica Biosystems, Buffalo  
510 Grove, IL), Leica DFC9000 sCMOS Monochrome Camera, and LasX software. Whole mount images  
511 were acquired using a Zeiss LSM 780 point scanning confocal (Zeiss Microscope Systems, Jena,  
512 Germany) with high sensitivity 32 anode Hybrid-GaAsP detectors. BmN4 mitotic spreads were  
513 acquired on a Zeiss AxioObserver Z1 wide-field inverted fluorescence microscope with 100x/1.4 oil  
514 Plan-APO objective, a Hamamatsu C13440 ORCA-Flash 4.0 V3 Digital CMOS camera, and ZEN blue  
515 software. Images were processed using Huygens deconvolution software (SVI, Hilversum,  
516 Netherlands), and tiffs were created in ImageJ. Meiotic bivalent quantification was performed  
517 manually.

518

### 519 **Acknowledgements**

520 We would like to thank the members of the Lei and Drinnenberg labs, as well as Jamie  
521 Walters, Petr Nguyen, and Martina Dalikova for helpful discussion. We would also like to thank Stacie  
522 Hughes, Scott Hawley, Jean-René Huynh, and Anahi Molla-Herman for critical reading of the  
523 manuscript.

524

## 525 **Funding**

526 This work was funded by the Intramural Program of the National Institute of Diabetes and  
527 Digestive and Kidney Diseases, National Institutes of Health (DK015602 to E.P.L.), and by LabEx DEEP  
528 (ANR-11-LABX-0044, ANR-10-IDEX-0001-02 to I.A.D.), an ATIP-AVENIR research grant, Institut Curie,  
529 the CNRS and the ERC (CENEVO-758757 to I.A.D.). The funders had no role in study design, data  
530 collection and analysis, decision to publish, or preparation of the manuscript.

531

## 532 **Competing Interests**

533 The authors declare no competing interests.

534

## 535 **References**

- 536 1. Bascom-Slack CA, Ross LO, Dawson DS. Chiasmata, crossovers, and meiotic chromosome  
537 segregation. *Adv Genet.* 1997;35:253–84.
- 538 2. Fawcett DW. THE FINE STRUCTURE OF CHROMOSOMES IN THE MEIOTIC PROPHASE OF  
539 VERTEBRATE SPERMATOCYTES. *The Journal of Biophysical and Biochemical Cytology.* 1956 Jul  
540 25;2(4):403–6.
- 541 3. Moses MJ. Chromosomal Structures in Crayfish Spermatocytes. *J Biophys Biochem Cytol.* 1956  
542 Mar 25;2(2):215–8.
- 543 4. Agostinho A, Kouznetsova A, Hernández-Hernández A, Bernhem K, Blom H, Brismar H, et al.  
544 Sexual dimorphism in the width of the mouse synaptonemal complex. *J Cell Sci.* 2018 Mar  
545 1;131(5):jcs212548.
- 546 5. Cahoon CK, Yu Z, Wang Y, Guo F, Unruh JR, Slaughter BD, et al. Superresolution expansion  
547 microscopy reveals the three-dimensional organization of the *Drosophila* synaptonemal  
548 complex. *Proc Natl Acad Sci USA.* 2017 15;114(33):E6857–66.
- 549 6. Capilla-Pérez L, Durand S, Hurel A, Lian Q, Chambon A, Taochy C, et al. The synaptonemal  
550 complex imposes crossover interference and heterochiasmy in *Arabidopsis*. *PNAS [Internet].*  
551 2021 Mar 23 [cited 2021 Mar 17];118(12). Available from:  
552 <https://www.pnas.org/content/118/12/e2023613118>

- 553 7. Qiao H, Chen JK, Reynolds A, Höög C, Paddy M, Hunter N. Interplay between Synaptonemal  
554 Complex, Homologous Recombination, and Centromeres during Mammalian Meiosis. *PLOS*  
555 *Genetics*. 2012 Jun 28;8(6):e1002790.
- 556 8. Xu H, Tong Z, Ye Q, Sun T, Hong Z, Zhang L, et al. Molecular organization of mammalian meiotic  
557 chromosome axis revealed by expansion STORM microscopy. *PNAS*. 2019 Sep  
558 10;116(37):18423–8.
- 559 9. Yoon S, Choi E-H, Kim J-W, Kim KP. Structured illumination microscopy imaging reveals  
560 localization of replication protein A between chromosome lateral elements during mammalian  
561 meiosis. *Exp Mol Med*. 2018 Aug 28;50(8):1–12.
- 562 10. Blokhina YP, Nguyen AD, Draper BW, Burgess SM. The telomere bouquet is a hub where meiotic  
563 double-strand breaks, synapsis, and stable homolog juxtaposition are coordinated in the  
564 zebrafish, *Danio rerio*. *PLOS Genetics*. 2019 Jan 17;15(1):e1007730.
- 565 11. Bisig CG, Guiraldelli MF, Kouznetsova A, Scherthan H, Höög C, Dawson DS, et al. Synaptonemal  
566 Complex Components Persist at Centromeres and Are Required for Homologous Centromere  
567 Pairing in Mouse Spermatocytes. *PLOS Genetics*. 2012 Jun 28;8(6):e1002701.
- 568 12. Christophorou N, Rubin T, Huynh J-R. Synaptonemal complex components promote centromere  
569 pairing in pre-meiotic germ cells. *PLoS Genet*. 2013;9(12):e1004012.
- 570 13. Boateng KA, Bellani MA, Gregoretto IV, Pratto F, Camerini-Otero RD. Homologous Pairing  
571 Preceding SPO11 Mediated Double Strand Breaks in Mice. *Dev Cell*. 2013 Jan 28;24(2):196–205.
- 572 14. Ishiguro K, Kim J, Shibuya H, Hernández-Hernández A, Suzuki A, Fukagawa T, et al. Meiosis-  
573 specific cohesin mediates homolog recognition in mouse spermatocytes. *Genes Dev*. 2014 Mar  
574 15;28(6):594–607.
- 575 15. Scherthan J, Bahler J, Kohli. Dynamics of chromosome organization and pairing during meiotic  
576 prophase in fission yeast. *J Cell Biol*. 1994 Oct 2;127(2):273–85.
- 577 16. Joyce EF, Apostolopoulos N, Beliveau BJ, Wu C -ting. Germline Progenitors Escape the  
578 Widespread Phenomenon of Homolog Pairing during *Drosophila* Development. *PLoS Genet*.  
579 2013 Dec 19;9(12):e1004013.
- 580 17. Nguyen SC, Joyce EF. Programmable Chromosome Painting with Oligopaints. In: Shav-Tal Y,  
581 editor. *Imaging Gene Expression: Methods and Protocols* [Internet]. New York, NY: Springer New  
582 York; 2019 [cited 2019 Aug 14]. p. 167–80. (Methods in Molecular Biology). Available from:  
583 [https://doi.org/10.1007/978-1-4939-9674-2\\_11](https://doi.org/10.1007/978-1-4939-9674-2_11)
- 584 18. Beliveau BJ, Joyce EF, Apostolopoulos N, Yilmaz F, Fonseka CY, McCole RB, et al. Versatile design  
585 and synthesis platform for visualizing genomes with Oligopaint FISH probes. *Proc Natl Acad Sci*  
586 *USA*. 2012 Dec 26;109(52):21301–6.
- 587 19. Fields BD, Nguyen SC, Nir G, Kennedy S. A multiplexed DNA FISH strategy for assessing genome  
588 architecture in *Caenorhabditis elegans*. *eLife* [Internet]. 2019 May 14 [cited 2019 Jun 5];8.  
589 Available from: <https://elifesciences.org/articles/42823>

- 590 20. Albert PS, Zhang T, Semrau K, Rouillard J-M, Kao Y-H, Wang C-JR, et al. Whole-chromosome  
591 paints in maize reveal rearrangements, nuclear domains, and chromosomal relationships. *Proc*  
592 *Natl Acad Sci U S A*. 2019 Jan 29;116(5):1679–85.
- 593 21. Beliveau BJ, Boettiger AN, Avendaño MS, Jungmann R, McCole RB, Joyce EF, et al. Single-  
594 molecule super-resolution imaging of chromosomes and in situ haplotype visualization using  
595 Oligopaint FISH probes. *Nature Communications*. 2015 May 12;6(1):7147.
- 596 22. Beliveau BJ, Boettiger AN, Nir G, Bintu B, Yin P, Zhuang X, et al. In Situ Super-Resolution Imaging  
597 of Genomic DNA with OligoSTORM and OligoDNA-PAINT. *Methods Mol Biol*. 2017;1663:231–52.
- 598 23. Bintu B, Mateo LJ, Su J-H, Sinnott-Armstrong NA, Parker M, Kinrot S, et al. Super-resolution  
599 chromatin tracing reveals domains and cooperative interactions in single cells. *Science*. 2018 Oct  
600 26;362(6413).
- 601 24. Boettiger AN, Bintu B, Moffitt JR, Wang S, Beliveau BJ, Fudenberg G, et al. Super-resolution  
602 imaging reveals distinct chromatin folding for different epigenetic states. *Nature*. 2016  
603 Jan;529(7586):418–22.
- 604 25. Boyle S, Rodesch MJ, Halvensleben HA, Jeddloh JA, Bickmore WA. Fluorescence in situ  
605 hybridization with high-complexity repeat-free oligonucleotide probes generated by massively  
606 parallel synthesis. *Chromosome Res*. 2011 Oct 18;19(7):901–9.
- 607 26. Han Y, Zhang T, Thammapichai P, Weng Y, Jiang J. Chromosome-Specific Painting in Cucumis  
608 Species Using Bulkied Oligonucleotides. *Genetics*. 2015 Jul;200(3):771–9.
- 609 27. Joyce EF, Williams BR, Xie T, Wu C -ting. Identification of Genes That Promote or Antagonize  
610 Somatic Homolog Pairing Using a High-Throughput FISH–Based Screen. *PLOS Genetics*. 2012  
611 May 10;8(5):e1002667.
- 612 28. Luppino JM, Park DS, Nguyen SC, Lan Y, Xu Z, Yunker R, et al. Cohesin promotes stochastic  
613 domain intermingling to ensure proper regulation of boundary-proximal genes. *Nature Genetics*.  
614 2020 Aug;52(8):840–8.
- 615 29. Qu M, Li K, Han Y, Chen L, Li Z, Han Y. Integrated Karyotyping of Woodland Strawberry (*Fragaria*  
616 *vesca*) with Oligopaint FISH Probes. *Cytogenet Genome Res*. 2017;153(3):158–64.
- 617 30. Rosin LF, Nguyen SC, Joyce EF. Condensin II drives large-scale folding and spatial partitioning of  
618 interphase chromosomes in *Drosophila* nuclei. *PLoS Genet*. 2018;14(7):e1007393.
- 619 31. Rosin LF, Crocker O, Isenhardt RL, Nguyen SC, Xu Z, Joyce EF. Chromosome territory formation  
620 attenuates the translocation potential of cells. *Dernburg AF, Struhl K, Bosco G, editors. eLife*.  
621 2019 Nov 4;8:e49553.
- 622 32. Hylton CA, Hansen K, Bourgeois A, Dean JET. Sex Chromosome Pairing Mediated by Euchromatic  
623 Homology in *Drosophila* Male Meiosis. *Genetics*. 2020 Mar 1;214(3):605–16.

- 624 33. do Vale Martins L, Yu F, Zhao H, Dennison T, Lauter N, Wang H, et al. Meiotic crossovers  
625 characterized by haplotype-specific chromosome painting in maize. *Nature Communications*.  
626 2019 Oct 10;10(1):4604.
- 627 34. Cortes-Silva N, Ulmer J, Kiuchi T, Hsieh E, Cornilleau G, Ladid I, et al. CenH3-Independent  
628 Kinetochores Assembly in Lepidoptera Requires CCAN, Including CENP-T. *Current Biology*. 2020  
629 Feb 24;30(4):561-572.e10.
- 630 35. Mon H, Lee JM, Mita K, Goldsmith MR, Kusakabe T. Chromatin-induced spindle assembly plays  
631 an important role in metaphase congression of silkworm holocentric chromosomes. *Insect*  
632 *Biochem Mol Biol*. 2014 Feb;45:40–50.
- 633 36. Murakami A, Imai HT. Cytological evidence for holocentric chromosomes of the silkworms,  
634 *Bombyx mori* and *B. mandarina*, (Bombycidae, Lepidoptera). *Chromosoma*. 1974;47(2):167–78.
- 635 37. Senaratne AP, Muller H, Fryer KA, Kawamoto M, Katsuma S, Drinnenberg IA. Formation of the  
636 CenH3-Deficient Holocentromere in Lepidoptera Avoids Active Chromatin. *Current Biology*  
637 [Internet]. 2020 Oct 29 [cited 2020 Dec 9]; Available from:  
638 <http://www.sciencedirect.com/science/article/pii/S0960982220314482>
- 639 38. Moore LL, Morrison M, Roth MB. HCP-1, a protein involved in chromosome segregation, is  
640 localized to the centromere of mitotic chromosomes in *Caenorhabditis elegans*. *J Cell Biol*. 1999  
641 Nov 1;147(3):471–80.
- 642 39. Albertson DG, Thomson JN. The kinetochores of *Caenorhabditis elegans*. *Chromosoma*.  
643 1982;86(3):409–28.
- 644 40. Melters DP, Paliulis LV, Korf IF, Chan SWL. Holocentric chromosomes: convergent evolution,  
645 meiotic adaptations, and genomic analysis. *Chromosome Res*. 2012 Jul 1;20(5):579–93.
- 646 41. Heckmann S, Jankowska M, Schubert V, Kumke K, Ma W, Houben A. Alternative meiotic  
647 chromatid segregation in the holocentric plant *Luzula elegans*. *Nat Commun*. 2014 Oct 8;5:4979.
- 648 42. Albertson DG, Thomson JN. Segregation of holocentric chromosomes at meiosis in the  
649 nematode, *Caenorhabditis elegans*. *Chromosome Res*. 1993 May;1(1):15–26.
- 650 43. Dumont J, Oegema K, Desai A. A kinetochores-independent mechanism drives anaphase  
651 chromosome separation during acentrosomal meiosis. *Nat Cell Biol*. 2010 Sep;12(9):894–901.
- 652 44. Maddox PS, Oegema K, Desai A, Cheeseman IM. “Holo”er than thou: chromosome segregation  
653 and kinetochores function in *C. elegans*. *Chromosome Res*. 2004;12(6):641–53.
- 654 45. Melters DP, Paliulis LV, Korf IF, Chan SWL. Holocentric chromosomes: convergent evolution,  
655 meiotic adaptations, and genomic analysis. *Chromosome Res*. 2012 Jul 1;20(5):579–93.
- 656 46. Schvarzstein M, Wignall SM, Villeneuve AM. Coordinating cohesion, co-orientation, and  
657 congression during meiosis: lessons from holocentric chromosomes. *Genes Dev*. 2010 Feb  
658 1;24(3):219–28.

- 659 47. Shakes DC, Wu J, Sadler PL, LaPrade K, Moore LL, Noritake A, et al. Spermatogenesis-Specific  
660 Features of the Meiotic Program in *Caenorhabditis elegans*. *PLOS Genetics*. 2009 Aug  
661 21;5(8):e1000611.
- 662 48. Wignall SM, Villeneuve AM. Lateral microtubule bundles promote chromosome alignment  
663 during acentrosomal oocyte meiosis. *Nat Cell Biol*. 2009 Jul;11(7):839–44.
- 664 49. Albertson DG, Rose AM, Villeneuve AM. Chromosome Organization, Mitosis, and Meiosis. In:  
665 Riddle DL, Blumenthal T, Meyer BJ, Priess JR, editors. *C elegans II* [Internet]. 2nd ed. Cold Spring  
666 Harbor (NY): Cold Spring Harbor Laboratory Press; 1997 [cited 2021 Jan 13]. Available from:  
667 <http://www.ncbi.nlm.nih.gov/books/NBK20058/>
- 668 50. Martinez-Perez E, Schvarzstein M, Barroso C, Lightfoot J, Dernburg AF, Villeneuve AM.  
669 Crossovers trigger a remodeling of meiotic chromosome axis composition that is linked to two-  
670 step loss of sister chromatid cohesion. *Genes Dev*. 2008 Oct 15;22(20):2886–901.
- 671 51. Monen J, Maddox PS, Hyndman F, Oegema K, Desai A. Differential role of CENP-A in the  
672 segregation of holocentric *C. elegans* chromosomes during meiosis and mitosis. *Nat Cell Biol*.  
673 2005 Dec;7(12):1248–55.
- 674 52. Friedländer M, Wahrman J. The spindle as a basal body distributor. A study in the meiosis of the  
675 male silkworm moth, *Bombyx mori*. *J Cell Sci*. 1970 Jul;7(1):65–89.
- 676 53. Holm PB, Rasmussen SW. Chromosome pairing, recombination nodules and chiasma formation  
677 in diploid *Bombyx* males. *Carlsberg Res Commun*. 1980 Nov 1;45(6):483.
- 678 54. Rasmussen SW, Holm PB. The Meiotic Prophase in *Bombyx mori*. In: King RC, Akai H, editors.  
679 *Insect Ultrastructure: Volume 1* [Internet]. Boston, MA: Springer US; 1982 [cited 2021 Jan 12]. p.  
680 61–85. Available from: [https://doi.org/10.1007/978-1-4615-7266-4\\_3](https://doi.org/10.1007/978-1-4615-7266-4_3)
- 681 55. Fielder SM, Kempfer R, Kelly WG. Multiple Sex-Specific Differences in the Regulation of Meiotic  
682 Progression in *C. elegans*. *bioRxiv*. 2020 Mar 14;2020.03.12.989418.
- 683 56. Drinnenberg IA, deYoung D, Henikoff S, Malik HS. Recurrent loss of CenH3 is associated with  
684 independent transitions to holocentricity in insects. *Elife*. 2014;3.
- 685 57. Maeda T. Chiasma Studies in the Silkworm, *Bombyx mori* L. *The Japanese journal of genetics*.  
686 1939;15(3):118–27.
- 687 58. Rasmussen SW. The meiotic prophase in *Bombyx mori* females analyzed by three-dimensional  
688 reconstructions of synaptonemal complexes. *Chromosoma*. 1976 Sep 1;54(3):245–93.
- 689 59. Rasmussen SW. The transformation of the synaptonemal complex into the “elimination  
690 chromatin” in *Bombyx mori* oocytes. *Chromosoma*. 1977 Sep 1;60(3):205–21.
- 691 60. Beliveau BJ, Kishi JY, Nir G, Sasaki HM, Saka SK, Nguyen SC, et al. OligoMiner provides a rapid,  
692 flexible environment for the design of genome-scale oligonucleotide in situ hybridization probes.  
693 *Proc Natl Acad Sci USA*. 2018 06;115(10):E2183–92.



- 694 61. Kawamoto M, Jouraku A, Toyoda A, Yokoi K, Minakuchi Y, Katsuma S, et al. High-quality genome  
695 assembly of the silkworm, *Bombyx mori*. *Insect Biochemistry and Molecular Biology*. 2019 Apr  
696 1;107:53–62.
- 697 62. Beckemeyer EF, Shirk PD. Development of the larval ovary in the moth, *Plodia interpunctella*.  
698 *Journal of Insect Physiology*. 2004 Nov 1;50(11):1045–51.
- 699 63. Page SL, Hawley RS. Chromosome Choreography: The Meiotic Ballet. *Science*. 2003 Aug  
700 8;301(5634):785–9.
- 701 64. Pawlowski WP, Cande WZ. Coordinating the events of the meiotic prophase. *Trends in Cell*  
702 *Biology*. 2005 Dec 1;15(12):674–81.
- 703 65. Chen S, Liu Y, Yang X, Liu Z, Luo X, Xu J, et al. Dysfunction of dimorphic sperm impairs male  
704 fertility in the silkworm. *Cell Discovery*. 2020 Sep 8;6(1):1–15.
- 705 66. Friedlander M, Seth RK, Reynolds SE. Eupyrene and apyrene sperm: Dichotomous  
706 spermatogenesis in Lepidoptera. *Advances in Insect Physiology, Vol 32*. 2005;206–308.
- 707 67. Friedländer M. Control of the eupyrene-apyrene sperm dimorphism in Lepidoptera. *J Insect*  
708 *Physiol*. 1997 Nov;43(12):1085–92.
- 709 68. Meves F. Ueber oligopyrene und apyrene spermien und über ihre Entstehung, nach  
710 Beobachtungen an *Paludina* und *Pygaera*. *Arch f Mikrosk Anat*. 1902;61:1–84.
- 711 69. Sahara K, Kawamura N. Double copulation of a female with sterile diploid and polyploid males  
712 recovers fertility in *Bombyx mori*. *Zygote*. 2002 Feb;10(1):23–9.
- 713 70. Sahara K, Kawamura N. Roles of actin networks in peristaltic squeezing of sperm bundles in  
714 *Bombyx mori*. *J Morphol*. 2004 Jan;259(1):1–6.
- 715 71. Sakai H, Oshima H, Yuri K, Gotoh H, Daimon T, Yaginuma T, et al. Dimorphic sperm formation by  
716 *Sex-lethal*. *PNAS*. 2019 May 21;116(21):10412–7.
- 717 72. King RC, Aggarwal SK, Aggarwal U. The development of the female *Drosophila* reproductive  
718 system. *Journal of Morphology*. 1968;124(2):143–65.
- 719 73. Paul S, Keshan B. Ovarian Development and Vitellogenin Gene Expression under Heat Stress in  
720 Silkworm, *Bombyx mori* [Internet]. Vol. 2016, *Psyche*. Hindawi; 2016 [cited 2021 Feb 26]. p.  
721 e4242317. Available from: <https://www.hindawi.com/journals/psyche/2016/4242317/>
- 722 74. Meng X, Zhu F, Chen K. Silkworm: A Promising Model Organism in Life Science. *J Insect Sci*  
723 [Internet]. 2017 Oct 9 [cited 2020 Apr 25];17(5). Available from:  
724 <https://www.ncbi.nlm.nih.gov/pmc/articles/PMC5633739/>
- 725 75. Mita K, Kasahara M, Sasaki S, Nagayasu Y, Yamada T, Kanamori H, et al. The genome sequence of  
726 silkworm, *Bombyx mori*. *DNA Res*. 2004 Feb 29;11(1):27–35.



- 727 76. Xia Q, Zhou Z, Lu C, Cheng D, Dai F, Li B, et al. A draft sequence for the genome of the  
728 domesticated silkworm (*Bombyx mori*). *Science*. 2004 Dec 10;306(5703):1937–40.
- 729 77. Hemmer LW, Blumenstiel JP. Holding it together: rapid evolution and positive selection in the  
730 synaptonemal complex of *Drosophila*. *BMC Evolutionary Biology*. 2016 May 5;16(1):91.
- 731 78. Tromer EC, Wemyss TA, Waller RF, Akiyoshi B. Repurposing of Synaptonemal Complex Proteins  
732 for Kinetochores in Kinetoplastida. *bioRxiv*. 2021 Feb 6;2021.02.06.430040.
- 733 79. King TD, Leonard CJ, Cooper JC, Nguyen S, Joyce EF, Phadnis N. Recurrent losses and rapid  
734 evolution of the condensin II complex in insects. *Mol Biol Evol*. 2019 Jul 4;
- 735 80. Metz CW. Chromosome studies on the Diptera. II. The paired association of chromosomes in the  
736 Diptera, and its significance. *Journal of Experimental Zoology*. 1916;21(2):213–79.
- 737 81. Williams BR, Bateman JR, Novikov ND, Wu C-T. Disruption of topoisomerase II perturbs pairing in  
738 *drosophila* cell culture. *Genetics*. 2007 Sep;177(1):31–46.
- 739 82. Wolfe SL, John B. The organization and ultrastructure of male meiotic chromosomes in  
740 *oncopeltus fasciatus*. *Chromosoma*. 1965 Jun 1;17(2):85–103.
- 741 83. Pe´rez R, Panzera F, Page J, Suja JA, Rufas JS. Meiotic behaviour of holocentric chromosomes:  
742 orientation and segregation of autosomes in *Triatoma infestans* (Heteroptera). *Chromosome*  
743 *Res*. 1997 Feb 1;5(1):47–56.
- 744 84. Moffitt JR, Zhuang X. RNA Imaging with Multiplexed Error Robust Fluorescence in situ  
745 Hybridization. *Methods Enzymol*. 2016;572:1–49.

746

747

## Supplemental Figures

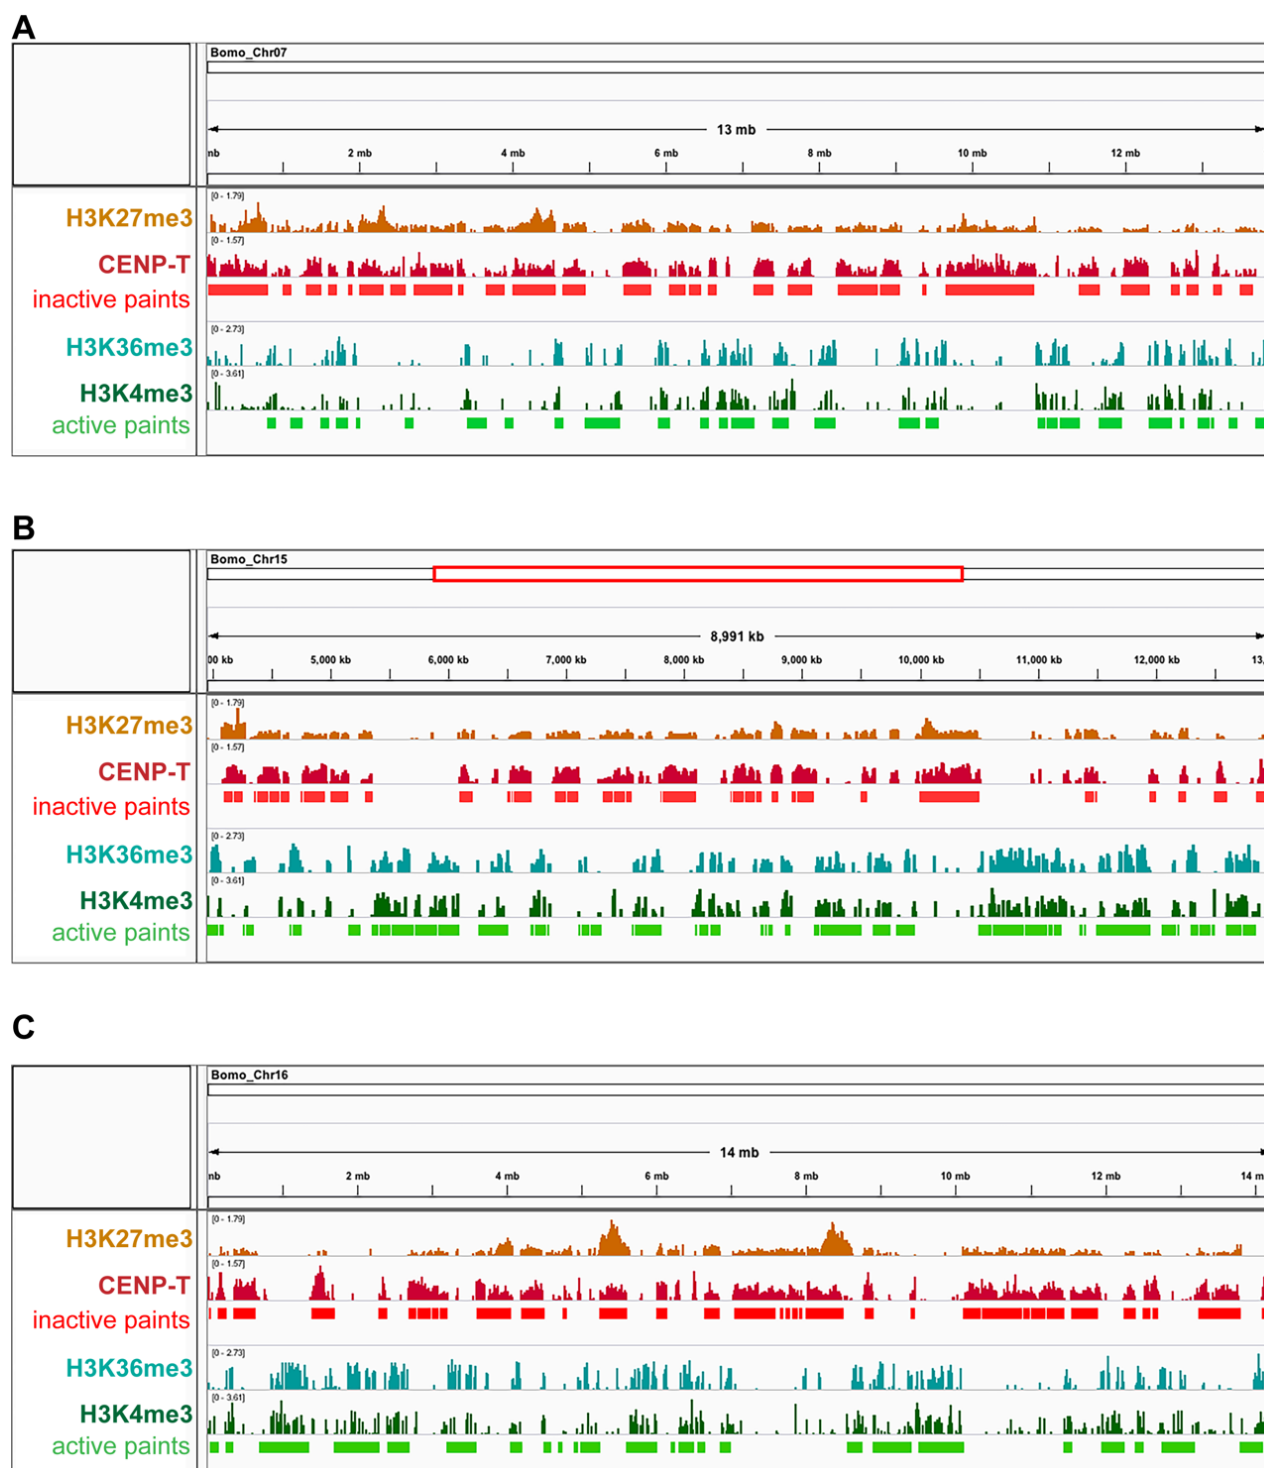

**Figure S1. ChIP-seq profiles used to design active and inactive chromosome paints.** Screenshots of ChIP-seq data used to design active/inactive chromosome paints. Inactive: H3K27me3 (orange), Centromere Protein T (CENP-T; dark red). Inactive paint domains shown in bright red. Active: H3K36me3 (teal), H3K4me3 (dark green). Active paint domains shown in bright green. ChIP-seq data were previously published (see Materials and Methods). Chromosome 7 is shown in A, part of chromosome 15 is shown in B (coordinates Chr15:3,900,000-12,891,000), and chromosome 16 is shown in C.

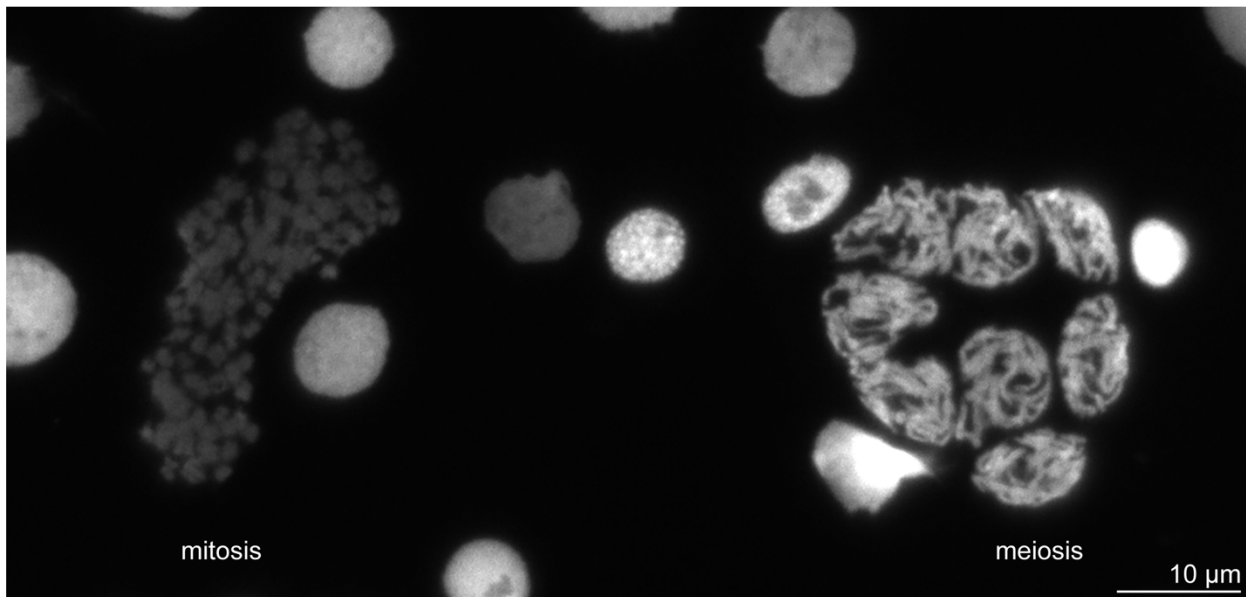

**Figure S2. Mitotic and meiotic nuclei in early 5<sup>th</sup> instar larval testes squash.**

Representative image showing a cluster of mitotic chromosomes (left) and a cluster of meiotic prophase I cells (right) labeled with DAPI.

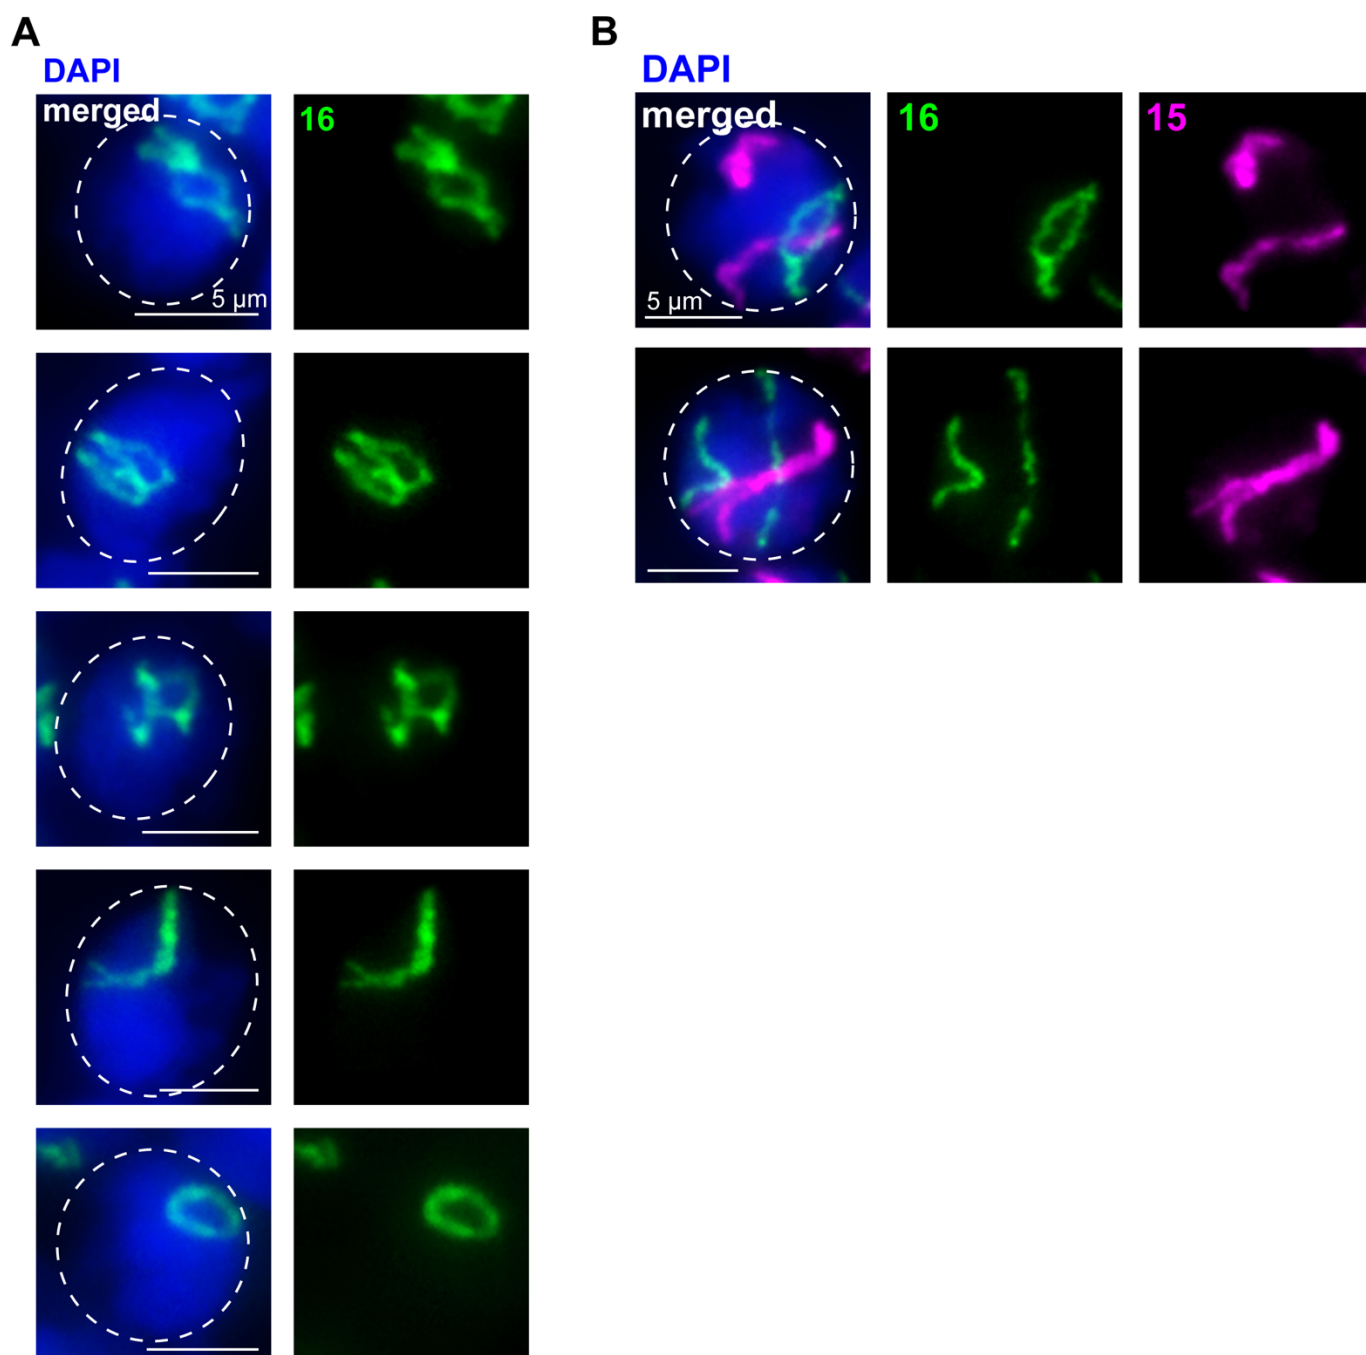

**Figure S3. Partially paired chromosome configurations in early meiotic prophase in larval testes.**

A) Oligopaints for chromosome 16 (green) in representative zygote nuclei. Dashed line approximates the nuclear edge.

B) Oligopaints for chromosomes 16 (green) and 15 (magenta) in representative zygote nuclei. Top: Ch16 has begun pairing while ch15 remains entirely unpaired. Bottom: Ch15 is nearly completely paired while ch16 remains unpaired. Dashed line approximates the nuclear edge.

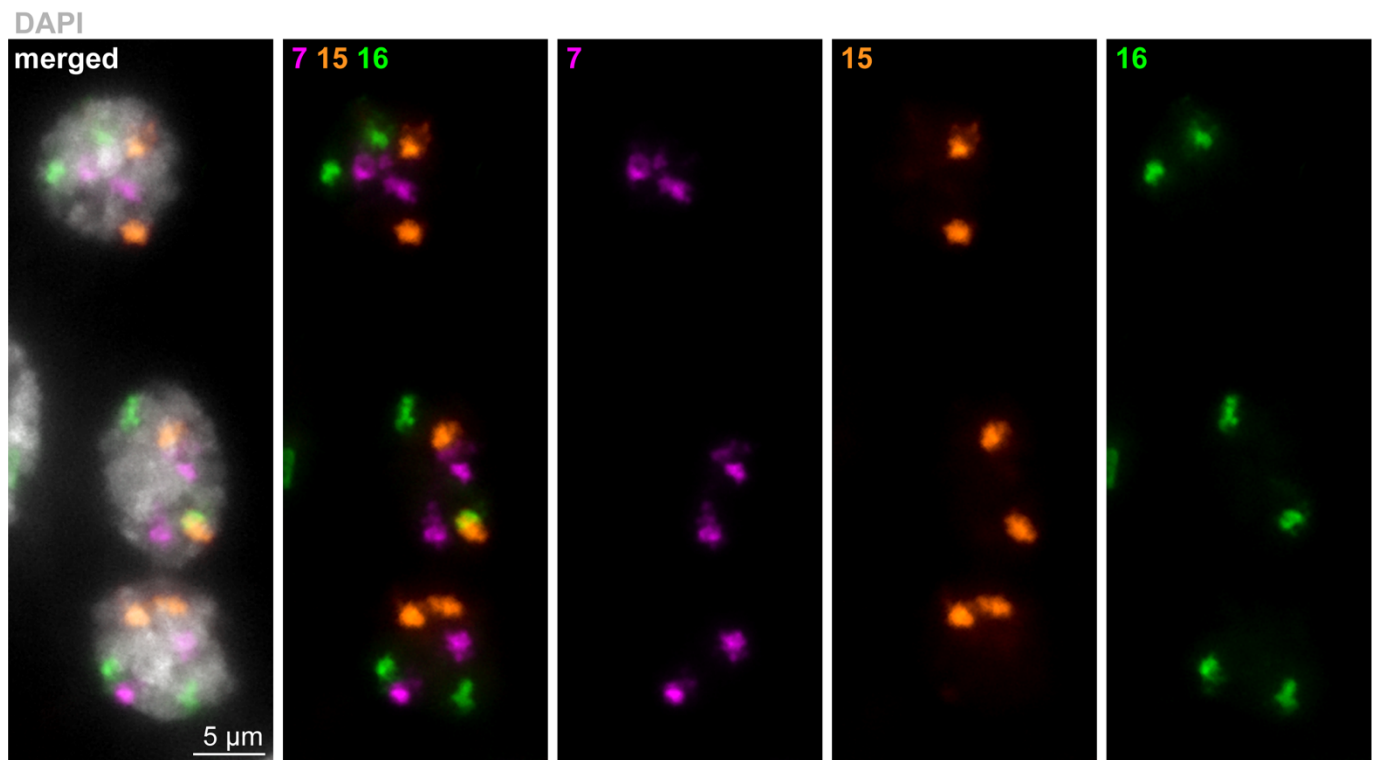

**Figure S4. Somatic cells with unpaired homologs from larval testes squashes.**

Three nuclei (DAPI in gray) labeled with Oligopaints to chromosomes 7 (magenta), 15 (orange), and 16 (green) in somatic cells from late 4<sup>th</sup> instar larval testes squash. Two signals per nucleus indicates unpaired homologs.

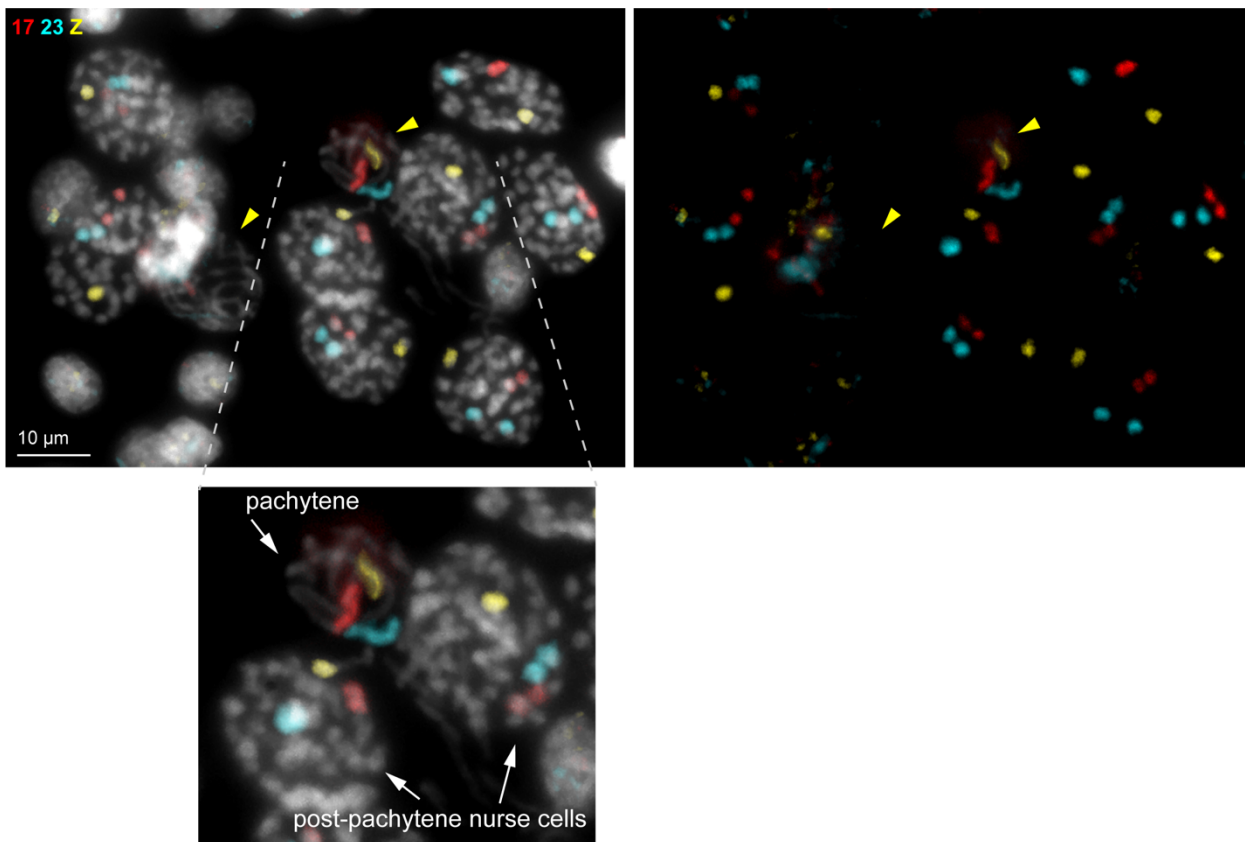

**Figure S5. Pachytene and post-pachytene nurse cells labeled with whole chromosome paints.**

Top: Representative field from early 5<sup>th</sup> instar larval ovary squash labeled with whole chromosome paints for ch17 (red), ch23 (cyan), and chZ (yellow). Left, merged with DAPI, right, paints alone. Yellow arrowheads indicate pachytene cells. Note: female *B. mori* are heterogametic and harbor a single Z and a single W chromosome (compared to two copies of ch17 and ch23). As the W chromosome is largely repetitive, it is not suitable for the Oligopaint design utilized here. Bottom: zoom showing pachytene and post-pachytene nurse cells, as indicated.



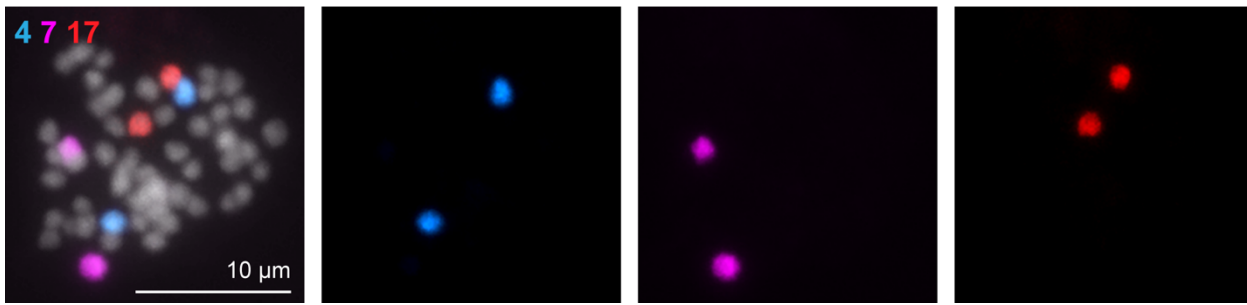

**Figure S6. Mitotic cell labeled with whole chromosome paints from 5<sup>th</sup> instar larval testes.** Representative mitotic cell labeled with whole chromosome paints for ch4 (blue), ch7 (magenta) and ch17 (red).

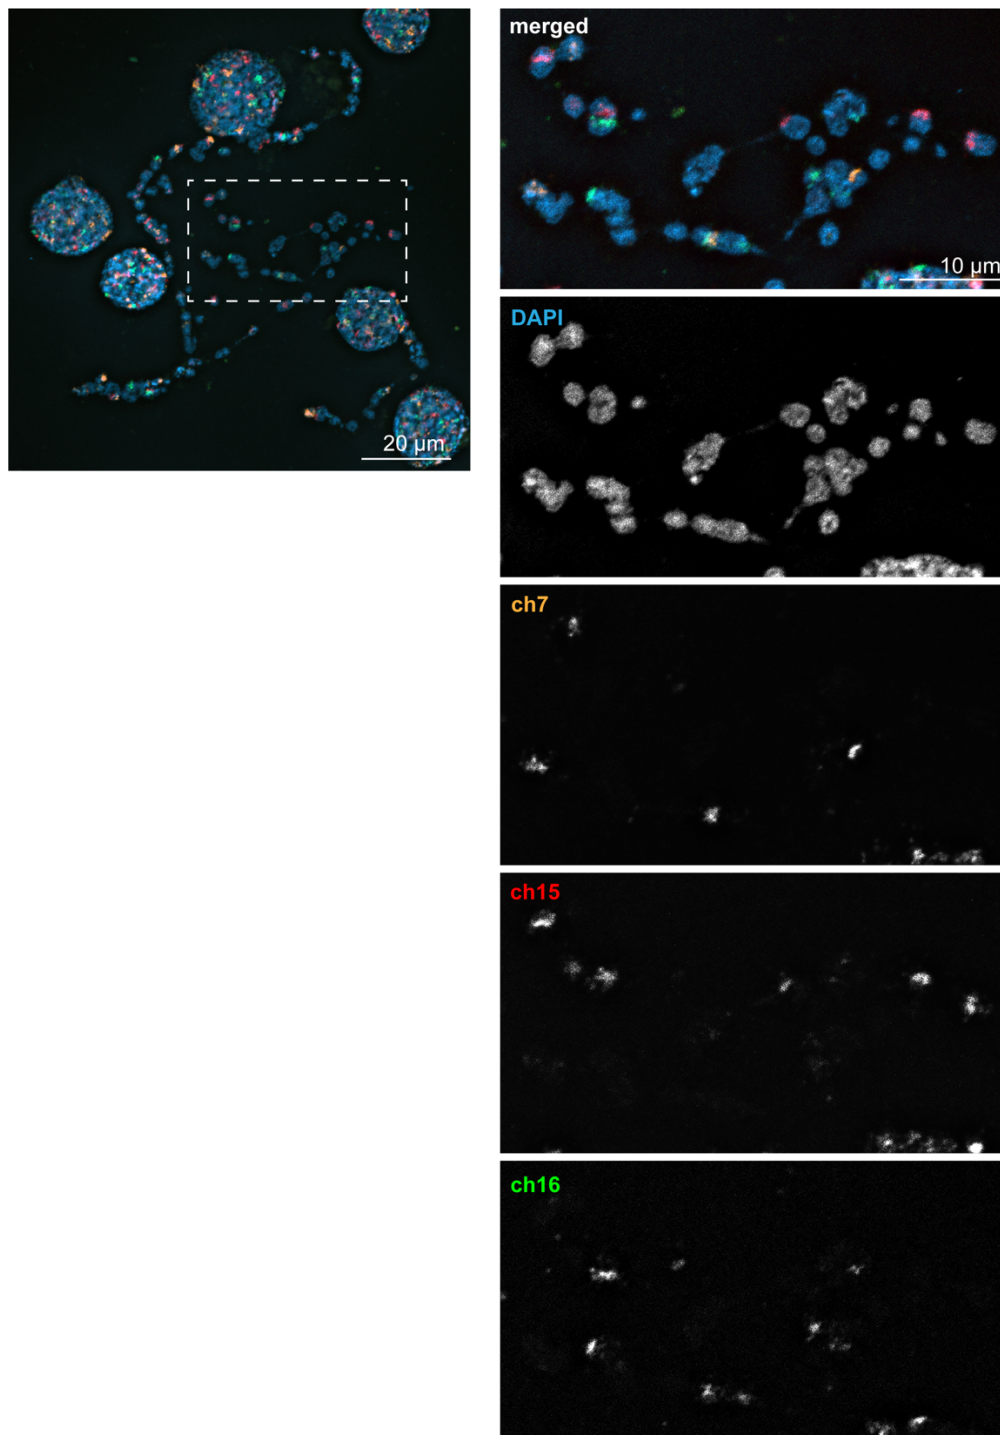

**Figure S7. Mitotic spreads from BmN4 cultured cells labeled with whole chromosome Oligopaints.**

Left: representative mitotic chromosome spread from BmN4 cultured cells labeled with whole chromosome paints for ch7 (orange), ch15 (red), and ch16 (green). White box indicates zoom shown to the right. No entire chromosomes are labeled in the cell line and instead several chromosomes are partially labeled with each paint, indicating a large amount of translocations in the this cell line compared to animals.

5th instar larval testis

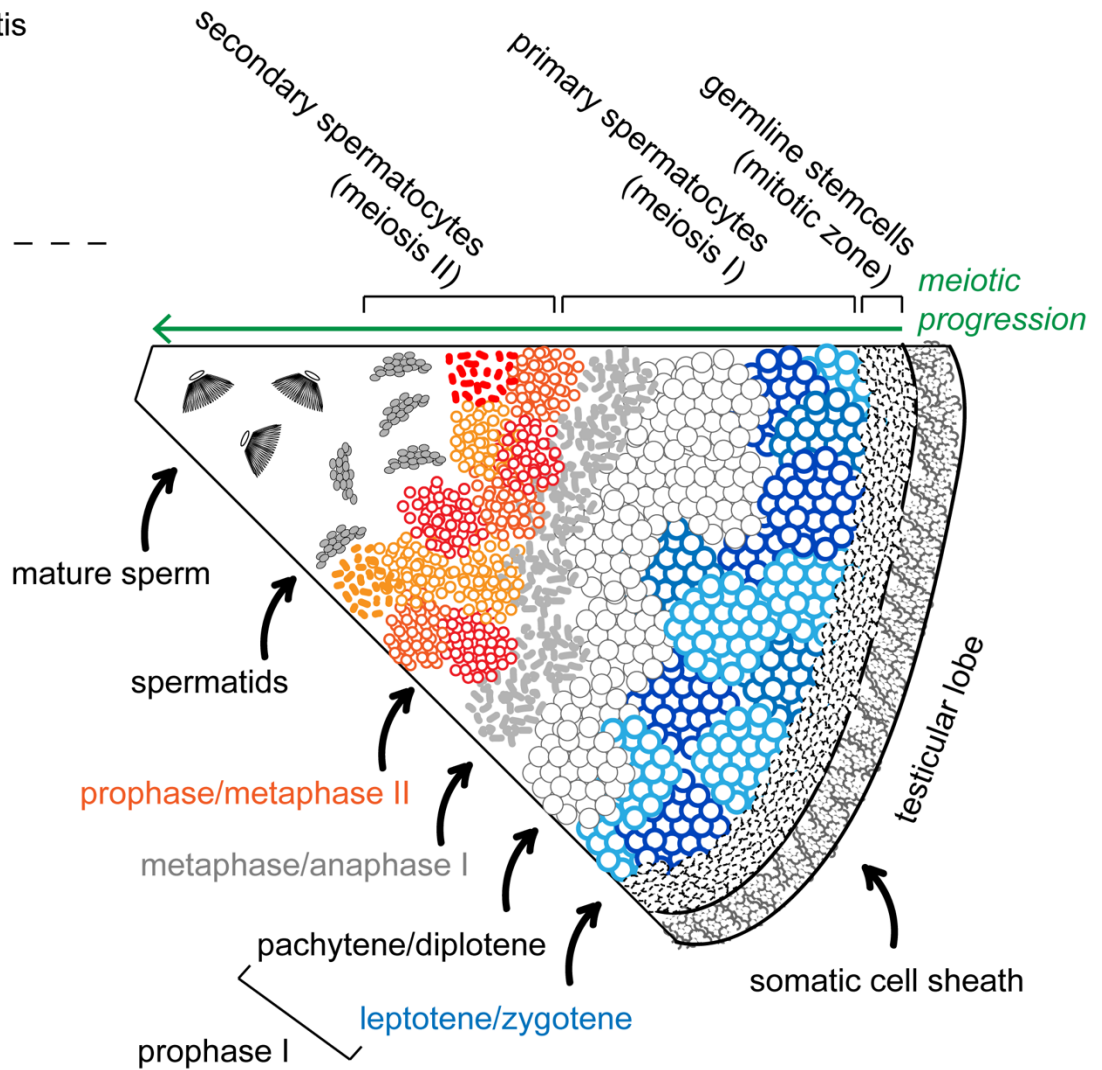

**Figure S8. Cartoon schematic of 5<sup>th</sup> instar larval testis.**

Mature 5<sup>th</sup> instar larval testes are comprised of four testicular lobes, each of which harbors germline stem cells (mitotic zone) and spermatocytes in all stages of meiosis up to mature sperm; progressing from right to left in the image. Additionally, each lobe is surrounded by somatic cells in the sheath and in the septae separating the lobes.

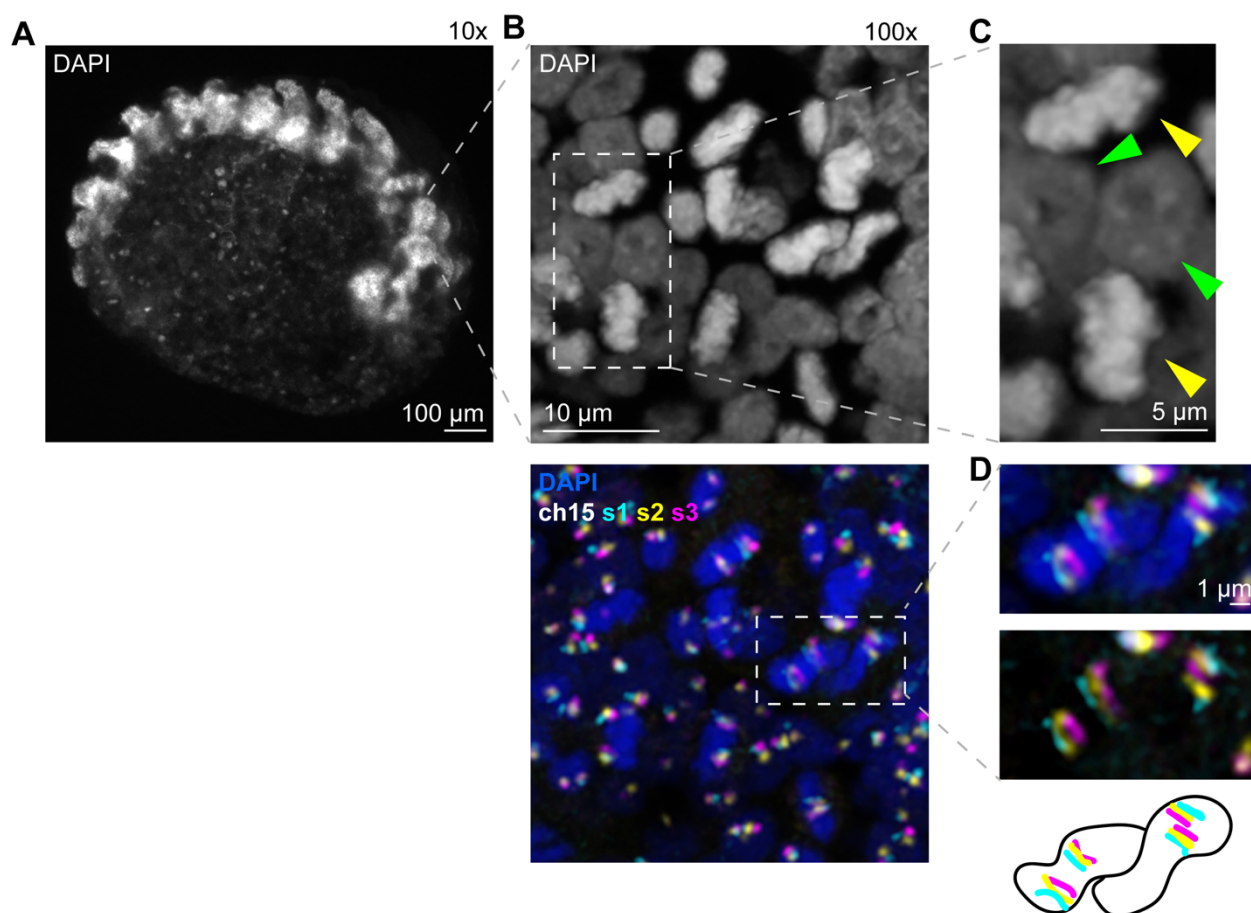

**Figure S9. Ch15 stripe paints in a post-diapause embryo.**

A) Whole-mount embryo stained with DAPI imaged at 10x.

B) 100x image of whole-mount embryo stained with DAPI (top) and labeled with ch15 stripe paints (bottom).

C) Zoom of B (top). Yellow arrow heads indicate mitotic cells, green arrow heads indicate interphase cells.

D) Zoom of B (bottom), showing two mitotic cells labeled with ch15 stripe paints and DAPI stain (top) or only stripe paints (middle). Bottom, cartoon schematic, with the black outline representing the border of the DAPI stain.

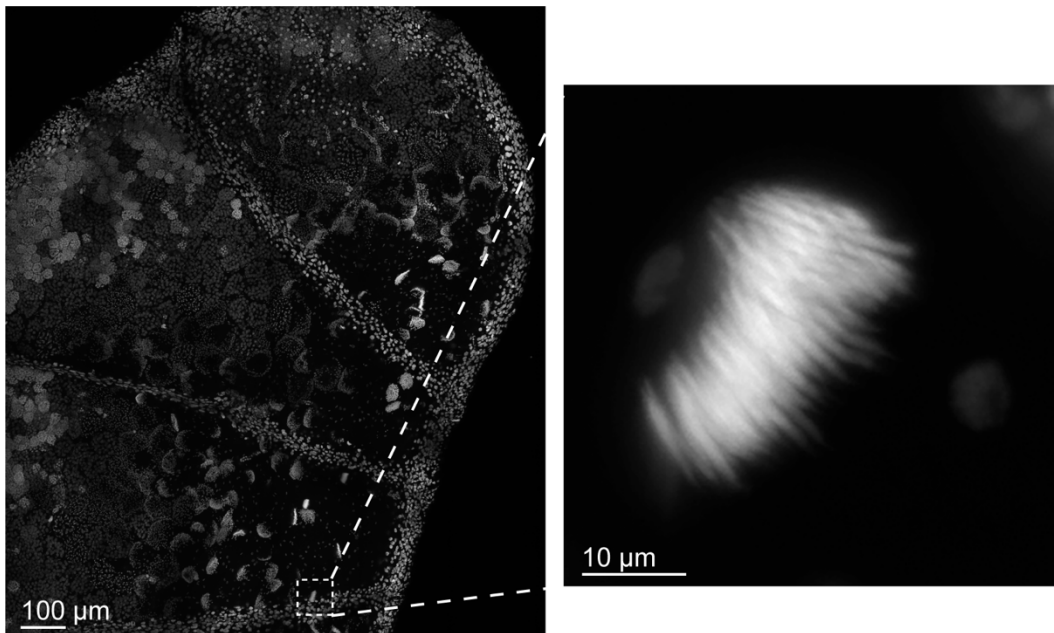

**Figure S10. Mature sperm in 5<sup>th</sup> instar larval testes.**

Left: 10x image of larval testes stained with DAPI. White box indicates zoom shown to the right. Right: zoom of mature eupyrene sperm bundle labeled with DAPI.

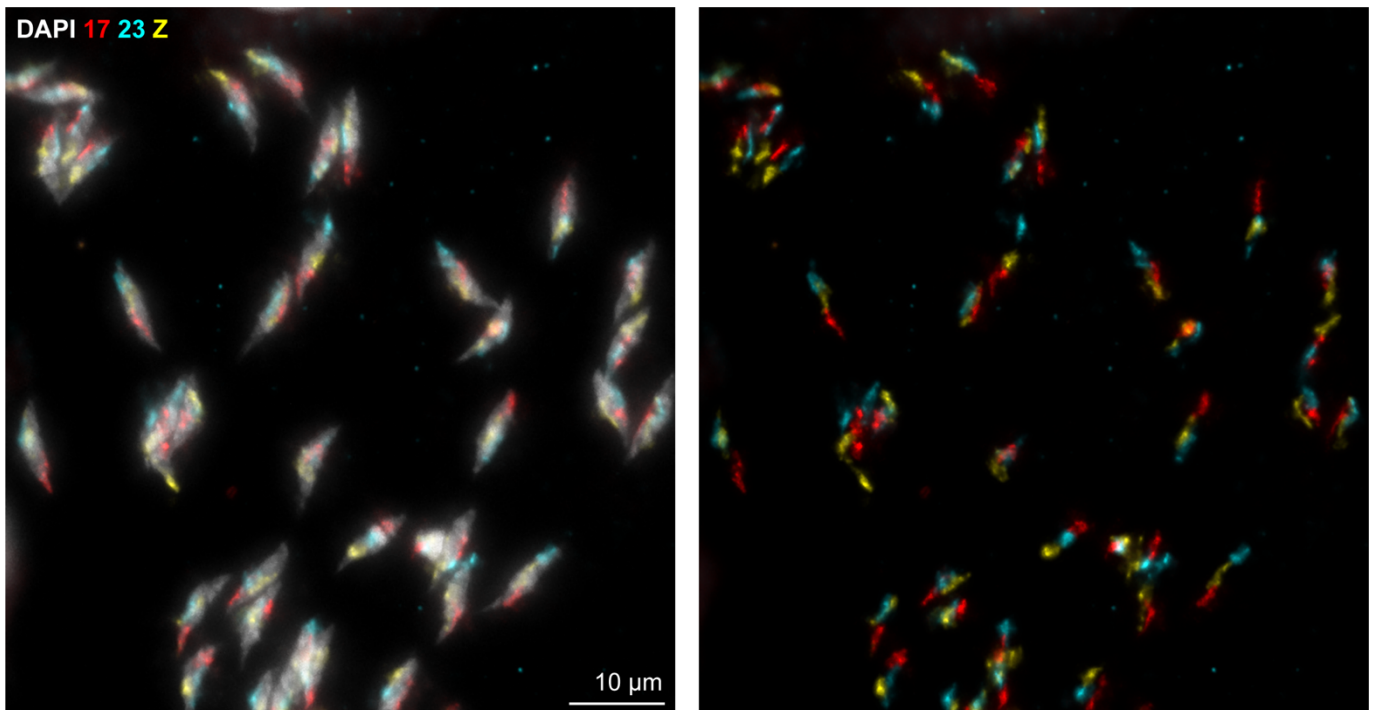

**Figure S11. Oligopaints in mature sperm from 5<sup>th</sup> instar larval testis squash.**

Oligopaints labeling chromosomes 17 (red), 23 (cyan) and Z (yellow) in mature sperm from a 5<sup>th</sup> instar larval testis squash. DAPI is shown in gray.



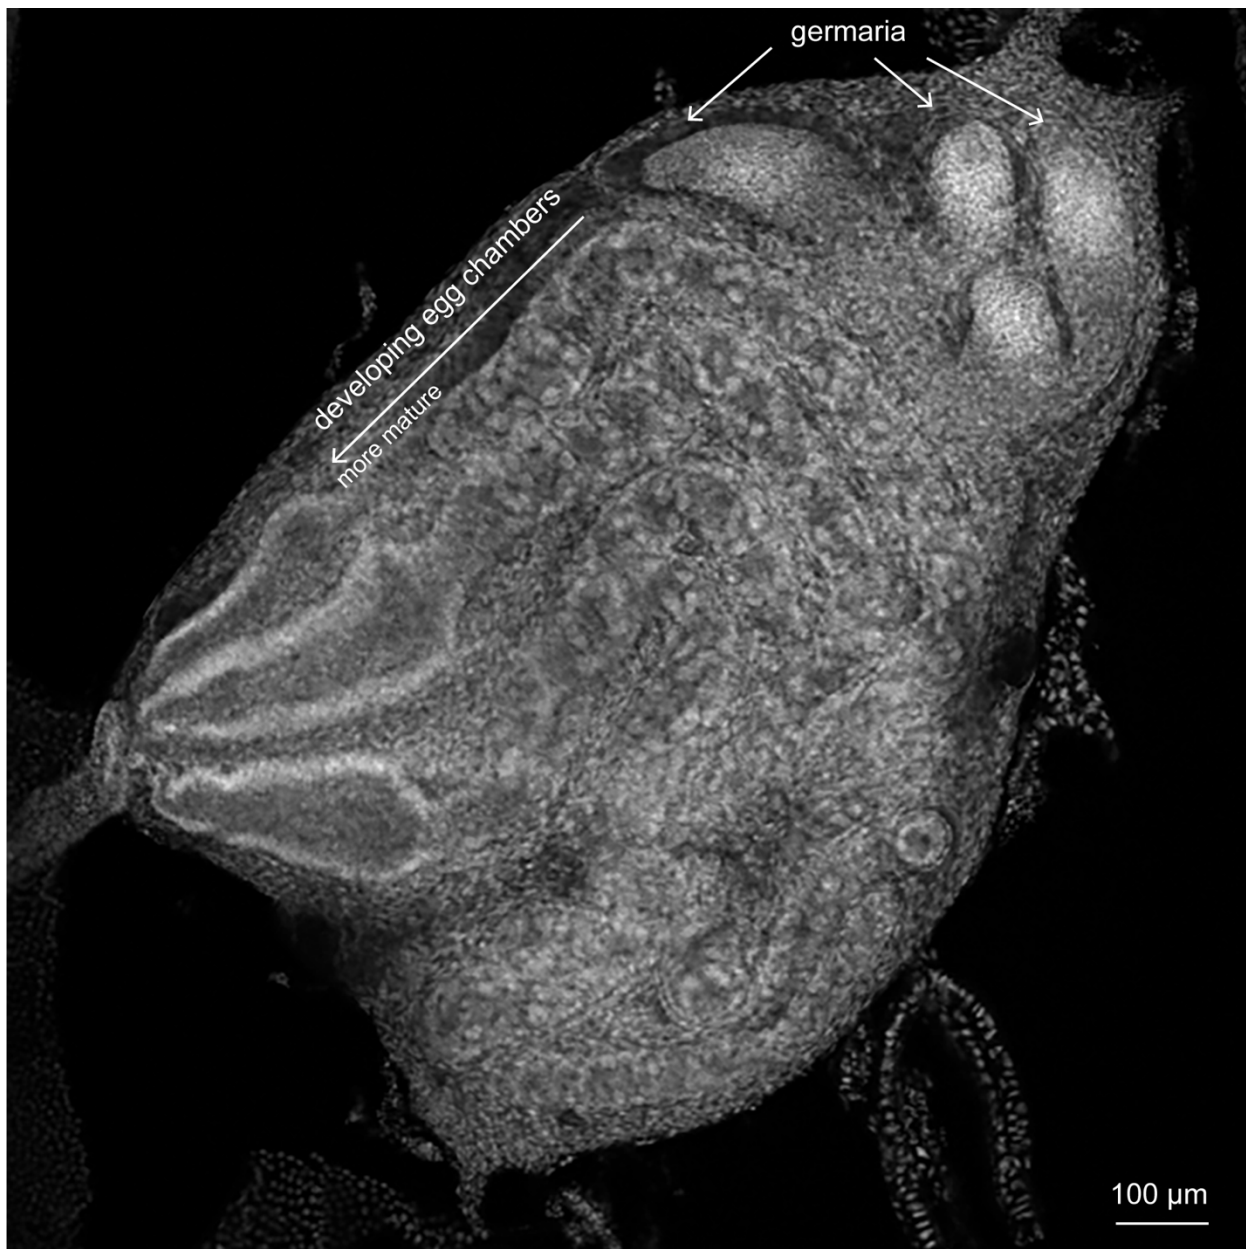

**Figure S12. 5<sup>th</sup> instar larval ovary.**

DAPI staining on a whole mount 5<sup>th</sup> instar larval ovary.
